# Supplementary material for: New potential pyrrhotite and pentlandite reference materials for sulfur and iron isotope microanalysis
Source: Royal Society of Chemistry journal article supplement (doi:10.1039/d1ja00029b), 2021-01-01
Supplement: d1ja00029b3.xlsx [file d1ja00029b3.xlsx]

## Sheet: Sheet1
Table S4.
Sulfur isotope results from reference and sample sulfides
Sample ID	Session	32S intensity	Measured isotope ratios				Calibrated δ values in ‰
			34S/32S	± SE (%)	33S/32S	± SE (%)	δ34S	± 2s	δ33S	± 2s
Sonora pyrite
Sonora@1	1	3425514000	0.0444131	0.000601877	0.00790421	0.00147674	1.61024	0.22	0.754194	0.14
Sonora@2	1	3424863000	0.0444172	0.000729742	0.00790497	0.00162049	1.70194	0.22	0.85055	0.14
Sonora@3	1	3467163000	0.0444071	0.000550169	0.00790393	0.00139263	1.47393	0.22	0.718901	0.14
Sonora@4	1	3423570000	0.0444163	0.00054624	0.00790466	0.00157262	1.68247	0.22	0.811576	0.14
Sonora@5	1	3507328000	0.0444164	0.000745547	0.007905	0.00144095	1.68406	0.22	0.855374	0.14
Sonora@6	1	3396828000	0.0444149	0.000750101	0.00790482	0.00175835	1.65054	0.22	0.832015	0.14
Sonora@7	1	3421838000	0.0444095	0.000587546	0.00790438	0.0019347	1.52646	0.22	0.77641	0.14
Sonora@8	1	3413697000	0.0444146	0.00074866	0.00790489	0.00162236	1.6433	0.22	0.840267	0.14
Sonora@9	1	3363533000	0.0443995	0.000564548	0.00790383	0.00185351	1.30049	0.22	0.706333	0.14
Sonora@10	1	3336406000	0.0444145	0.00069907	0.00790515	0.00169301	1.64036	0.22	0.874036	0.14
Sonora@11	1	3402248000	0.0444131	0.000560018	0.00790515	0.00196961	1.61024	0.22	0.873655	0.14
Sonora@12	1	3238016000	0.0444114	0.000716578	0.00790445	0.00162944	1.56971	0.22	0.784916	0.14
Sonora@13	1	3468778000	0.0444185	0.00083683	0.00790551	0.0018036	1.73229	0.22	0.919104	0.14
Sonora@14	1	3407699000	0.0444128	0.000607094	0.00790503	0.00161135	1.60209	0.22	0.858294	0.14
Sonora@15	1	3422869000	0.0444139	0.000532519	0.00790514	0.00220912	1.62768	0.22	0.872894	0.14
Sonora@16	1	3402269000	0.0444173	0.000590904	0.00790564	0.00148333	1.70421	0.22	0.935481	0.14
Sonora@1	2	3841811000	0.0443787	0.000521401	0.00790139	0.00145453	1.49394	0.24	0.741347	0.12
Sonora@2	2	3798955000	0.0443781	0.000537465	0.00790179	0.00152854	1.48081	0.24	0.791493	0.12
Sonora@3	2	3787803000	0.0443873	0.000588003	0.00790261	0.00137352	1.69003	0.24	0.895339	0.12
Sonora@4	2	3736405000	0.0443807	0.000587327	0.00790199	0.00138984	1.54127	0.24	0.816883	0.12
Sonora@5	2	3737211000	0.0443846	0.000608416	0.00790203	0.00173431	1.62889	0.24	0.821834	0.12
Sonora@6	2	3700175000	0.0443858	0.000669378	0.00790232	0.00167644	1.65607	0.24	0.859158	0.12
Sonora@7	2	3698133000	0.0443852	0.000731492	0.00790223	0.00134582	1.64135	0.24	0.847859	0.12
Sonora@8	2	3662200000	0.0443869	0.000541742	0.00790249	0.00141589	1.68143	0.24	0.880105	0.12
Sonora@9	2	3655622000	0.0443907	0.000608822	0.00790271	0.00132001	1.76634	0.24	0.908289	0.12
Sonora@10	2	3674266000	0.0443667	0.00143502	0.00790064	0.00180419	1.222	0.24	0.646133	0.12
Sonora@11	2	3599869000	0.044387	0.000543561	0.00790233	0.00178335	1.68278	0.24	0.860047	0.12
Sonora@12	2	3699407000	0.0443876	0.000694663	0.00790247	0.00171296	1.6966	0.24	0.878201	0.12
Sonora@13	2	3710305000	0.0443851	0.000453626	0.00790232	0.00138668	1.64089	0.24	0.858904	0.12
Sonora@14	2	3708980000	0.0443788	0.000647095	0.00790145	0.00151742	1.49689	0.24	0.748456	0.12
Sonora@15	2	3723520000	0.0443867	0.000743904	0.00790223	0.00176416	1.67554	0.24	0.847225	0.12
Sonora@16	2	3699260000	0.0443856	0.000680682	0.00790221	0.0017209	1.65154	0.24	0.84532	0.12
Sonora@17	2	3688335000	0.0443864	0.000639562	0.00790208	0.0015561	1.6692	0.24	0.82869	0.12
Sonora@18	2	3667032000	0.0443862	0.000573307	0.00790222	0.00157504	1.66444	0.24	0.846717	0.12
Sonosa@1	3	2325580000	0.0443959	0.00095995	0.00790087	0.00332993	1.52367	0.16	0.833211	0.22
Sonosa@2	3	2345084000	0.0443947	0.00100824	0.0079006	0.0029661	1.49537	0.16	0.79995	0.22
Sonosa@3	3	2468749000	0.0443953	0.00100792	0.0079018	0.00276481	1.5094	0.16	0.951403	0.22
Sonosa@4	3	2496991000	0.0443973	0.000880091	0.00790163	0.0022542	1.55469	0.16	0.93071	0.22
Sonosa@5	3	2502848000	0.0444012	0.000857676	0.00790179	0.00242577	1.64232	0.16	0.950134	0.22
Sonosa@6	3	2500565000	0.0444025	0.000888763	0.00790155	0.00347108	1.67243	0.16	0.920427	0.22
Sonosa@7	3	2511277000	0.0444047	0.000749886	0.00790294	0.00253392	1.72361	0.16	1.096	0.22
Sonosa@8	3	2501685000	0.0444081	0.000865665	0.00790219	0.00303019	1.79991	0.16	1.00155	0.22
Sonosa@9	3	2465148000	0.0443991	0.000993507	0.00790172	0.0029012	1.59681	0.16	0.941247	0.22
Sonosa@10	3	2491936000	0.0443997	0.00101987	0.00790155	0.00263657	1.60994	0.16	0.919538	0.22
Sonosa@11	3	2456600000	0.0443991	0.000747414	0.00790109	0.00272441	1.59635	0.16	0.861775	0.22
Sonosa@12	3	2495329000	0.0444012	0.000704438	0.00790209	0.00203558	1.64254	0.16	0.988092	0.22
Sonosa@13	3	2496588000	0.0444041	0.000704321	0.00790134	0.0025603	1.70889	0.16	0.893894	0.22
Sonosa@14	3	2499615000	0.044398	0.000861948	0.00790069	0.00290314	1.57122	0.16	0.810868	0.22
Sonosa@15	3	2527281000	0.0443999	0.000910848	0.00790052	0.00232485	1.61379	0.16	0.788778	0.22
Sonosa@16	3	2475850000	0.0443991	0.00107875	0.00790067	0.00251075	1.59545	0.16	0.808075	0.22
Sonosa@17	3	2533318000	0.0444029	0.000861501	0.00790128	0.0026673	1.68262	0.16	0.885261	0.22
Sonosa@18	3	2507497000	0.044404	0.000752426	0.00790135	0.00329385	1.70708	0.16	0.895037	0.22
Sonosa@19	3	2500912000	0.0443952	0.000958572	0.00790047	0.0028185	1.50623	0.16	0.782938	0.22
Sonosa@20	3	2508249000	0.0444008	0.000947597	0.00790069	0.00284995	1.63349	0.16	0.811375	0.22
Sonosa@21	3	2490213000	0.0444037	0.000996351	0.00790136	0.00350596	1.69893	0.16	0.895798	0.22
Sonosa@22	3	2471979000	0.0443979	0.000844976	0.00790045	0.00251048	1.56963	0.16	0.780653	0.22
Sonosa@23	3	2501057000	0.0444009	0.00110526	0.00790015	0.00220351	1.6362	0.16	0.742187	0.22
Sonosa@24	3	2463838000	0.0443953	0.000756554	0.00790031	0.00304746	1.50895	0.16	0.762245	0.22
Sonosa@25	3	2476097000	0.0443949	0.000955781	0.00789985	0.00281411	1.49989	0.16	0.703847	0.22
Sonosa@26	3	2459992000	0.0443932	0.000983294	0.0078999	0.00267518	1.46185	0.16	0.711083	0.22
Sonosa@27	3	2479939000	0.0443989	0.000713379	0.00790075	0.00288633	1.59205	0.16	0.818866	0.22
Sonosa@28	3	2450764000	0.0443975	0.000794419	0.00790017	0.00236336	1.55967	0.16	0.744472	0.22
Sonosa@29	3	2460281000	0.0443999	0.00104186	0.00789971	0.00249511	1.61469	0.16	0.686455	0.22
Sonosa@30	3	2418903000	0.0443949	0.000896958	0.00789887	0.00246761	1.50125	0.16	0.580323	0.22
Sonosa@31	3	2441619000	0.0443978	0.000712133	0.00790015	0.00250378	1.56579	0.16	0.741933	0.22
Sonosa@32	3	2462907000	0.0444035	0.00082329	0.00790063	0.00229927	1.69644	0.16	0.802743	0.22
Sonosa@33	3	2443189000	0.0444008	0.00102262	0.00789947	0.00258909	1.63349	0.16	0.655605	0.22
Sonosa@34	3	2403019000	0.0444017	0.000789754	0.00790065	0.00250491	1.65432	0.16	0.806424	0.22
Sonosa@35	3	2432391000	0.0444036	0.000713447	0.00790013	0.00286692	1.69666	0.16	0.740282	0.22
Sonosa@36	3	2449718000	0.0444065	0.000949604	0.00790121	0.00251525	1.76391	0.16	0.877009	0.22
Sonosa@37	3	2457510000	0.0444071	0.000865301	0.00790213	0.0027681	1.77591	0.16	0.993551	0.22
Sonosa@38	3	2456963000	0.0443966	0.000928263	0.00790022	0.00273621	1.53952	0.16	0.751073	0.22
Sonosa@38	3	2456963000	0.0443966	0.000928263	0.00790022	0.00273621	1.53952	0.16	0.751073	0.22
Sonosa@39	3	2477846000	0.0443985	0.000863857	0.00790087	0.00328877	1.58277	0.16	0.833211	0.22
Sonosa@40	3	2457395000	0.0443963	0.00084676	0.00790013	0.00268265	1.53273	0.16	0.739901	0.22
Snonsa@1	4	2311695000	0.0443924	0.000878914	0.00789919	0.00247588	1.47481	0.14	0.801736	0.18
Sonosa@2	4	2287513000	0.0443933	0.000844256	0.00789991	0.00334243	1.4936	0.14	0.892507	0.18
Sonosa@3	4	2285512000	0.0443931	0.00112545	0.00789937	0.00320546	1.48975	0.14	0.823953	0.18
Sonosa@4	4	2279858000	0.0443936	0.00098525	0.00789877	0.00339918	1.50153	0.14	0.747781	0.18
Sonosa@5	4	2275104000	0.0443943	0.00101965	0.00789819	0.00235419	1.51624	0.14	0.674911	0.18
Sonosa@6	4	2267343000	0.0443972	0.00114924	0.00789956	0.00327616	1.58349	0.14	0.8482	0.18
Sonosa@7	4	2295138000	0.0443987	0.00073783	0.00789969	0.00280885	1.61632	0.14	0.86572	0.18
Sonosa@8	4	2288168000	0.0443954	0.00105508	0.00789954	0.00253279	1.54138	0.14	0.846042	0.18
Sonosa@9	4	2324794000	0.0444001	0.00103857	0.00789972	0.00282023	1.64938	0.14	0.869401	0.18
Sonosa@10	4	2314460000	0.0443978	0.00101284	0.00789884	0.00322722	1.59708	0.14	0.756795	0.18
Sonosa@11	4	2289853000	0.0443964	0.00103152	0.00789948	0.00311651	1.56538	0.14	0.838806	0.18
Sonosa@12	4	2301010000	0.0443953	0.0010803	0.00789868	0.0026294	1.54002	0.14	0.736864	0.18
Sonosa@13	4	2307000000	0.0443962	0.00102502	0.00789931	0.00279801	1.56062	0.14	0.816335	0.18
Sonosa@14	4	2295110000	0.0444027	0.000994946	0.00789979	0.00281681	1.70848	0.14	0.878415	0.18
Sonosa@15	4	2324099000	0.0443959	0.00097727	0.00789973	0.003127	1.55406	0.14	0.870798	0.18
Sonosa@16	4	2347673000	0.0444051	0.000836229	0.0078998	0.00330372	1.76101	0.14	0.879811	0.18
Sonosa@17	4	2295158000	0.0443972	0.000901671	0.00789941	0.00289088	1.58327	0.14	0.829538	0.18
Sonosa@18	4	2309112000	0.0443955	0.000930557	0.00789855	0.00277452	1.54523	0.14	0.719979	0.18
Sonosa@19	4	2306039000	0.0443959	0.000963736	0.00790005	0.00291453	1.55428	0.14	0.911422	0.18
Sonosa@20	4	2306858000	0.0443982	0.00116398	0.00789934	0.00303445	1.60614	0.14	0.820652	0.18
Sonosa@21	4	2329483000	0.0443997	0.000965145	0.00790003	0.00243691	1.63897	0.14	0.907995	0.18
Sonosa@22	4	2335101000	0.0443985	0.00105397	0.00790091	0.00258835	1.61315	0.14	1.01971	0.18
Sonosa@23	4	2325414000	0.0443956	0.00113749	0.00789955	0.00331079	1.54636	0.14	0.847693	0.18
Sonosa@24	4	2324159000	0.0444042	0.00117845	0.00789958	0.00299165	1.74154	0.14	0.85112	0.18
Sonosa@25	4	2322901000	0.0444039	0.000887755	0.00790026	0.00299826	1.73384	0.14	0.937701	0.18
Sonosa@26	4	2325295000	0.0444033	0.00111388	0.00790012	0.00306076	1.72048	0.14	0.919928	0.18
Sonosa@27	4	2341630000	0.0444008	0.00122539	0.00790001	0.00229388	1.6632	0.14	0.905583	0.18
Sonosa@28	4	2320094000	0.0443986	0.00093557	0.00789904	0.00313407	1.61383	0.14	0.782566	0.18
Sonosa@29	4	2327180000	0.0443993	0.00111932	0.00789913	0.00301971	1.63014	0.14	0.793992	0.18
Sonosa@30	4	2319459000	0.044401	0.00126412	0.00790005	0.00273506	1.66863	0.14	0.910407	0.18
Sonosa@31	4	2323886000	0.0444009	0.00113381	0.00789958	0.003162	1.66614	0.14	0.85112	0.18
Sonosa@27	4	2341630000	0.0444008	0.00122539	0.00790001	0.00229388	1.6632	0.14	0.905583	0.18
Sonosa@28	4	2320094000	0.0443986	0.00093557	0.00789904	0.00313407	1.61383	0.14	0.782566	0.18
Sonosa@29	4	2327180000	0.0443993	0.00111932	0.00789913	0.00301971	1.63014	0.14	0.793992	0.18
Sonosa@30	4	2319459000	0.044401	0.00126412	0.00790005	0.00273506	1.66863	0.14	0.910407	0.18
Sonosa@31	4	2323886000	0.0444009	0.00113381	0.00789958	0.003162	1.66614	0.14	0.85112	0.18
Sonosa@32	4	2318710000	0.0444004	0.00104174	0.00789918	0.00257686	1.65527	0.14	0.800466	0.18
Sonosa@33	4	2291026000	0.0444013	0.000794122	0.00789913	0.00260856	1.6761	0.14	0.7945	0.18
Sonosa@34	4	2262408000	0.0444013	0.000816247	0.00789853	0.00398016	1.67588	0.14	0.718329	0.18
Sonosa@35	4	2253909000	0.0443985	0.00097559	0.00789886	0.00311302	1.61157	0.14	0.759588	0.18
Sonosa@36	4	2268562000	0.0444013	0.000865478	0.00789916	0.00400686	1.67542	0.14	0.798308	0.18
Sonosa@37	4	2263559000	0.0444011	0.00116588	0.00789765	0.00316355	1.67157	0.14	0.606865	0.18
Sonosa@38	4	2261677000	0.0443995	0.001246	0.00789786	0.00409155	1.6358	0.14	0.632255	0.18
Sonosa@39	4	2238383000	0.0443986	0.00125687	0.00789775	0.00321293	1.61429	0.14	0.619306	0.18
Sonosa@40	4	2247647000	0.0443963	0.0012238	0.00789791	0.00359271	1.56311	0.14	0.63873	0.18
Sonosa@41	4	2238822000	0.0443963	0.00118893	0.00789837	0.00328901	1.56153	0.14	0.698016	0.18
Sonosa@42	4	2207417000	0.0444017	0.00117322	0.00789959	0.00250109	1.68471	0.14	0.852136	0.18
Sonosa@43	4	2237172000	0.0444009	0.000852211	0.00789938	0.0026448	1.66659	0.14	0.825603	0.18
Sonosa@44	4	2251509000	0.0443976	0.00127225	0.00790088	0.00272148	1.593	0.14	1.01616	0.18
Sonosa@45	4	2249860000	0.0443965	0.000881127	0.00789969	0.00270642	1.56787	0.14	0.864831	0.18
Sonosa@46	4	2228587000	0.044399	0.00109314	0.00790067	0.00342042	1.62289	0.14	0.99026	0.18
Sonosa@47	4	2256356000	0.0443999	0.00113779	0.00790049	0.00347457	1.64327	0.14	0.967154	0.18
Sonosa@48	4	2215233000	0.0443924	0.000992803	0.00789945	0.00350862	1.47413	0.14	0.834997	0.18
Sonosa@49	4	2197915000	0.0443969	0.000884383	0.00789975	0.00259817	1.57489	0.14	0.872956	0.18
Sonosa@50	4	2188658000	0.0443974	0.00105212	0.00789997	0.00288981	1.58779	0.14	0.900505	0.18
Sonosa@51	4	2199673000	0.0443946	0.00103474	0.00789959	0.00335741	1.52349	0.14	0.852136	0.18
Sonosa@52	4	2177771000	0.0443928	0.00108188	0.00789895	0.00293856	1.48205	0.14	0.771268	0.18
Sonosa@53	4	2180864000	0.0443978	0.00136816	0.00789944	0.00286828	1.59572	0.14	0.83322	0.18
Sonosa@54	4	2184363000	0.044397	0.000931412	0.00789945	0.00412971	1.57761	0.14	0.834997	0.18
Balmat pyrite							16.2533	0.228559	8.35172	0.125076
Balmat@1	1	3429617000	0.0450706	0.000741468	0.00796506	0.0015031	16.4968	0.24	8.47972	0.14
Balmat@2	1	3410765000	0.0450626	0.000769635	0.00796404	0.00198973	16.3159	0.157037	8.35049	0.14
Balmat@3	1	3397647000	0.0450668	0.000534088	0.00796495	0.00170246	16.4114	0.389545	8.46538	0.14
Balmat@4	1	3309271000	0.0450663	0.000753382	0.00796452	0.00189447	16.4001	0.15936	8.41079	0.14
Balmat@5	1	3312015000	0.0450665	0.000746551	0.00796441	0.00239724	16.4037	0.433322	8.39657	0.14
Balmat@6	1	3394596000	0.0450656	0.000697955	0.00796464	0.00151246	16.3847	0.165241	8.42602	0.14
Balmat@7	1	3415677000	0.0450612	0.00094331	0.0079641	0.00198838	16.2849	0.156264	8.35722	0.14
Balmat@8	1	3451012000	0.0450648	0.00068296	0.00796469	0.00161834	16.3652	0.164753	8.43186	0.14
Balmat@9	1	3433056000	0.0450637	0.000613973	0.00796481	0.0018473	16.3415	0.164858	8.44773	0.14
Balmat@10	1	3444005000	0.0450614	0.000761591	0.00796421	0.0014709	16.288	0.166894	8.37181	0.14
Balmat@11	1	3264255000	0.045065	0.00072777	0.00796454	0.00188718	16.3698	0.158599	8.41282	0.14
Balmat@12	1	3353047000	0.045064	0.000595581	0.00796444	0.00170094	16.3471	0.162445	8.40051	0.14
Balmat@13	1	3430131000	0.0450643	0.000801338	0.0079645	0.00151987	16.3546	0.157628	8.40838	0.14
Balmat@14	1	3411000000	0.0450579	0.000803093	0.00796402	0.00154263	16.209	0.161732	8.34782	0.14
Balmat@15	1	3374078000	0.0450599	0.000692306	0.0079638	0.0018379	16.2543	0.16754	8.31976	0.14
Balmat@16	1	3374011000	0.0450635	0.000739874	0.00796419	0.0021653	16.3363	0.16315	8.3694	0.14
Balmat@17	1	3348596000	0.0450633	0.000831312	0.00796451	0.00183537	16.332	0.174879	8.41015	0.14
Balmat@18	1	3359762000	0.0450556	0.000579424	0.00796346	0.00186657	16.1576	0.170724	8.27685	0.14
Balmat@19	1	3427590000	0.0450548	0.000644081	0.00796383	0.00212257	16.1395	0.172581	8.32306	0.14
Balmat@20	1	3468862000	0.0450595	0.000507849	0.00796402	0.00159946	16.2446	0.16622	8.34744	0.14
Balmat@21	1	3476869000	0.0450568	0.000673995	0.00796391	0.00212208	16.1843	0.165074	8.33398	0.14
Balmat@22	1	3431751000	0.0450616	0.000780614	0.00796426	0.00156346	16.2926	0.158903	8.37778	0.14
Balmat@23	1	3280990000	0.0450607	0.000670907	0.00796415	0.00154262	16.272	0.161005	8.36445	0.14
Balmat@24	1	3276840000	0.045063	0.000717463	0.00796436	0.0014114	16.3247	0.188714	8.3901	0.14
Balmat@25	1	3307368000	0.0450655	0.000575113	0.007965	0.00117137	16.3822	0.157855	8.47134	0.14
Balmat@26	1	3294008000	0.0450678	0.000843598	0.00796491	0.00181348	16.4329	0.161518	8.46005	0.14
Balmat@27	1	3322467000	0.0450419	0.0020089	0.00796244	0.00176693	15.8474	0.239938	8.14647	0.14
Balmat@28	1	3411612000	0.045064	0.00065426	0.00796449	0.00166189	16.3467	0.242001	8.40685	0.14
Balmat@1	2	3790989000	0.0450277	0.000637532	0.00796118	0.00179714	16.1912	0.2	8.33129	0.1
Balmat@2	2	3777015000	0.0450275	0.000531773	0.00796132	0.00146141	16.1849	0.2	8.34856	0.1
Balmat@3	2	3767807000	0.0450215	0.000838027	0.00796067	0.00127505	16.0504	0.2	8.26655	0.1
Balmat@4	2	3774304000	0.0450262	0.000629237	0.0079613	0.00167234	16.1568	0.2	8.3464	0.1
Balmat@5	2	3761008000	0.0450248	0.000711038	0.00796089	0.00130167	16.1233	0.2	8.29422	0.1
Balmat@6	2	3767124000	0.0450318	0.000647606	0.00796159	0.00174661	16.2834	0.2	8.38334	0.1
Balmat@7	2	3764843000	0.0450337	0.000648097	0.00796156	0.00147942	16.3262	0.2	8.37915	0.1
Balmat@8	2	3757736000	0.045035	0.000647005	0.00796183	0.00152408	16.3545	0.2	8.41432	0.1
Balmat@9	2	3749282000	0.0450344	0.000627901	0.0079618	0.00175257	16.3429	0.2	8.40975	0.1
Balmat@10	2	3689082000	0.045012	0.00143272	0.00795961	0.0016553	15.8346	0.2	8.13185	0.1
Balmat@11	2	3716893000	0.0450291	0.000545919	0.00796108	0.00146446	16.2211	0.2	8.31885	0.1
Balmat@12	2	3748507000	0.0450319	0.000516649	0.00796141	0.00152173	16.2861	0.2	8.36011	0.1
Balmat@13	2	3724687000	0.0450277	0.000580026	0.00796092	0.00143292	16.1901	0.2	8.29854	0.1
Balmat@14	2	3740260000	0.0450347	0.00063176	0.00796192	0.00155773	16.3474	0.2	8.42486	0.1
Balmat@15	2	3672897000	0.0450206	0.00110786	0.00796064	0.00155446	16.0295	0.2	8.26325	0.1
Balmat@16	2	3717234000	0.0450327	0.000474515	0.0079614	0.00190822	16.3042	0.2	8.35986	0.1
Balmat@17	2	3730656000	0.0450293	0.000774101	0.00796133	0.0019814	16.2261	0.2	8.3511	0.1
Balmat@18	2	3696167000	0.0450312	0.000812482	0.00796141	0.00164096	16.27	0.2	8.36036	0.1
Balmat@19	2	3690604000	0.0450345	0.000636173	0.00796186	0.00161817	16.3452	0.2	8.41762	0.1
Balmat@20	2	3660283000	0.0450329	0.000621699	0.00796127	0.00149162	16.308	0.2	8.34221	0.1
Balmat@21	2	3706788000	0.0450286	0.000491207	0.00796113	0.00148785	16.2098	0.2	8.32571	0.1
Balmat@22	2	3694658000	0.0450191	0.000754638	0.00796035	0.00167713	15.9947	0.2	8.22592	0.1
Balmat@23	2	3700853000	0.0450287	0.000579251	0.00796114	0.00140123	16.2139	0.2	8.32583	0.1
Balmat@24	2	3730959000	0.0450341	0.000631277	0.0079618	0.00165911	16.335	0.2	8.41064	0.1
Balmat@25	2	3692576000	0.0450217	0.000596048	0.0079604	0.00170018	16.0547	0.2	8.23189	0.1
Balmat@26	2	3704334000	0.0450309	0.000665967	0.00796167	0.00142899	16.2625	0.2	8.39401	0.1
Balmat@27	2	3708915000	0.0450323	0.000573592	0.00796145	0.00160504	16.2945	0.2	8.36633	0.1
Balmat@28	2	3691132000	0.0450278	0.000618767	0.0079611	0.00161967	16.1921	0.2	8.32164	0.1
Balmat@29	2	3673644000	0.0450283	0.000770449	0.00796095	0.00114341	16.2039	0.2	8.30235	0.1
Balmat@30	2	3667793000	0.0450306	0.000751134	0.00796144	0.00128199	16.2555	0.2	8.36493	0.1
Balmat@31	2	3646990000	0.0450306	0.000657393	0.00796133	0.00179889	16.2551	0.2	8.35059	0.1
Balmat@32	2	3650343000	0.0450323	0.000732462	0.00796143	0.00155882	16.2936	0.2	8.36303	0.1
Balmat@33	2	3712670000	0.0450301	0.000633226	0.00796119	0.00136801	16.2435	0.2	8.3332	0.1
Balmat@34	2	3727448000	0.0450325	0.000705231	0.00796166	0.00144269	16.2988	0.2	8.39185	0.1
Balmat@35	2	3722900000	0.0450294	0.000713313	0.00796131	0.00194166	16.2274	0.2	8.34754	0.1
Balmat@36	2	3718268000	0.0450345	0.000665374	0.00796152	0.001366	16.3445	0.2	8.37407	0.1
Balmat@37	2	3659076000	0.0450305	0.00105516	0.00796127	0.00178205	16.2537	0.2	8.34272	0.1
Balmat@38	2	3657496000	0.0450304	0.000501147	0.00796103	0.0015248	16.2521	0.2	8.31276	0.1
Balmat@39	2	3648202000	0.0450307	0.000559929	0.00796128	0.00124426	16.2571	0.2	8.34411	0.1
Balmat@40	2	3638530000	0.0450293	0.000625229	0.00796094	0.00144341	16.2263	0.2	8.30146	0.1
Balmat@41	2	3612181000	0.0450264	0.00072587	0.00796077	0.00142637	16.1602	0.2	8.27886	0.1
Balmat@42	2	3723193000	0.0450299	0.000712822	0.00796126	0.00141905	16.2397	0.2	8.34132	0.1
Balmat@43	2	3741085000	0.0450289	0.000542849	0.00796114	0.00139216	16.2175	0.2	8.32596	0.1
Balmat@44	2	3775887000	0.0450349	0.000532341	0.0079615	0.00170713	16.354	0.2	8.3723	0.1
Balmat@45	2	3746517000	0.0450256	0.000581835	0.00796093	0.00136364	16.1425	0.2	8.29981	0.1
Balmat@46	2	3692885000	0.0450351	0.000658971	0.00796165	0.00189966	16.3581	0.2	8.39071	0.1
Balmat@47	2	3730274000	0.0450304	0.00055669	0.00796096	0.00175341	16.251	0.2	8.30362	0.1
Balmat@48	2	3727834000	0.0450277	0.00060879	0.00796084	0.00177791	16.1901	0.2	8.288	0.1
Balmat@49	2	3708710000	0.0450287	0.000576243	0.00796116	0.00150135	16.212	0.2	8.32926	0.1
Balmat@50	2	3738003000	0.0450266	0.00068277	0.00796095	0.00196013	16.1649	0.2	8.30273	0.1
Balmat@51	2	3720430000	0.0450287	0.000672222	0.00796126	0.00186499	16.2134	0.2	8.34119	0.1
Balmat@52	2	3727713000	0.045028	0.000572201	0.00796114	0.00137894	16.1971	0.2	8.32609	0.1
JC-Pn pentlandite
JC-Pn@1	3	1241553000	0.0441822	0.00100087	0.00787796	0.00486917	-0.145896	0.19	-0.0607378	0.29
JC-Pn@2	3	1235251000	0.044184	0.00116087	0.0078772	0.00426664	-0.104007	0.19	-0.156587	0.29
JC-Pn@3	3	1241653000	0.0441821	0.00113433	0.007878	0.00510986	-0.147708	0.19	-0.0556598	0.29
JC-Pn@4	3	1256824000	0.0441842	0.00125405	0.00787915	0.0048225	-0.0994784	0.19	0.0912236	0.29
JC-Pn@5	3	1252813000	0.0441822	0.00120745	0.00787897	0.00430675	-0.146349	0.19	0.0674836	0.29
JC-Pn@6	3	1312846000	0.0441848	0.00123992	0.00788008	0.00484985	-0.0872512	0.19	0.208908	0.29
JC-Pn@7	3	1312208000	0.0441793	0.00109291	0.00787976	0.00424107	-0.211561	0.19	0.167776	0.29
JC-Pn@8	3	1316106000	0.0441794	0.00111441	0.00787947	0.00474334	-0.209296	0.19	0.131594	0.29
JC-Pn@9	3	1321315000	0.0441843	0.00133563	0.00788001	0.00499384	-0.097667	0.19	0.199767	0.29
JC-Pn@10	3	1313557000	0.0441854	0.00111322	0.00787984	0.00480236	-0.0725334	0.19	0.179074	0.29
JC-Pn@11	3	1337140000	0.0441799	0.00156044	0.00787962	0.0048301	-0.19639	0.19	0.150256	0.29
JC-Pn@12	3	1335638000	0.0441865	0.00145489	0.00787941	0.00430699	-0.0473998	0.19	0.124358	0.29
JC-Pn@13	3	1315088000	0.0441825	0.00130731	0.0078794	0.00401102	-0.138877	0.19	0.122454	0.29
JC-Pn@14	3	1320210000	0.0441886	0.00119878	0.00787939	0.00407551	-0.000755442	0.19	0.121565	0.29
JC-Pn@15	3	1323880000	0.0441726	0.0017416	0.00787889	0.00390791	-0.361683	0.19	0.0573274	0.29
JC-Pn@16	3	1331728000	0.0441844	0.00115211	0.00787952	0.00403878	-0.0951762	0.19	0.137307	0.29
JC-Pn@17	3	1343543000	0.0441883	0.00121834	0.00788095	0.00467072	-0.00618973	0.19	0.319102	0.29
JC-Pn@18	3	1317140000	0.0441859	0.00113862	0.00787963	0.00487142	-0.0605326	0.19	0.15178	0.29
JC-Pn@19	3	1329123000	0.0441866	0.00117174	0.00787884	0.00494979	-0.0449091	0.19	0.0508529	0.29
JC-Pn@20	3	1341532000	0.0441858	0.00145629	0.00787949	0.00563583	-0.0630234	0.19	0.133752	0.29
JC-Pn@21	3	1322556000	0.0441844	0.00153231	0.00787999	0.00440121	-0.0963084	0.19	0.19799	0.29
JC-Pn@22	3	1323279000	0.0441824	0.00105634	0.00787884	0.00428919	-0.139783	0.19	0.0508529	0.29
JC-Pn@23	3	1327008000	0.0441838	0.000968039	0.00787903	0.00501988	-0.109215	0.19	0.0761163	0.29
JC-Pn@24	3	1330626000	0.0441842	0.0012593	0.00787949	0.00512329	-0.100384	0.19	0.133879	0.29
JC-Pn@25	3	1322256000	0.0441845	0.00144058	0.00787841	0.00552553	-0.0929119	0.19	-0.00259388	0.29
JC-Pn@26	3	1305314000	0.0441844	0.00109988	0.0078783	0.00397155	-0.094497	0.19	-0.0177011	0.29
JC-Pn@27	3	1321176000	0.0441858	0.00103117	0.00787879	0.00490329	-0.0648348	0.19	0.0453939	0.29
JC-Pn@28	3	1322694000	0.0441893	0.00144767	0.00787966	0.00521585	0.0150946	0.19	0.15508	0.29
JC-Pn@29	3	1322136000	0.0441839	0.00138562	0.007879	0.00440273	-0.106045	0.19	0.071546	0.29
JC-Pn@30	3	1312686000	0.0441809	0.00145802	0.00787923	0.00517051	-0.174426	0.19	0.101126	0.29
JC-Pn@31	3	1316855000	0.0441848	0.00118465	0.00787929	0.00468838	-0.0861191	0.19	0.109251	0.29
JC-Pn@32	3	1302472000	0.0441789	0.00110306	0.00787797	0.00459181	-0.219712	0.19	-0.0595953	0.29
JC-Pn@33	3	1311078000	0.0441861	0.00110665	0.00787927	0.00391115	-0.0571362	0.19	0.106077	0.29
JC-Pn@34	3	1311662000	0.0441844	0.00127084	0.00787942	0.00432046	-0.0954027	0.19	0.12512	0.29
JC-Pn@35	3	1321834000	0.0441757	0.00182123	0.00787884	0.00420313	-0.292169	0.19	0.0513607	0.29
JC-Pn@36	3	1315249000	0.0441804	0.00116488	0.00787855	0.00461369	-0.18688	0.19	0.0150524	0.29
JC-Pn@37	3	1301648000	0.0441729	0.00192243	0.00787793	0.00481338	-0.355569	0.19	-0.0644194	0.29
JC-Pn@38	3	1319025000	0.0441887	0.00144941	0.00788016	0.00494497	0.0019617	0.19	0.219572	0.29
JC-Pn@39	3	1312064000	0.0441844	0.00103801	0.00787974	0.00524792	-0.0951762	0.19	0.16511	0.29
JC-Pn@40	3	1303717000	0.0441829	0.00126761	0.00787942	0.00473744	-0.129367	0.19	0.125628	0.29
JC-Pn@41	3	1339190000	0.0441813	0.00190069	0.00787939	0.00413336	-0.166048	0.19	0.12093	0.29
JC-Pn@42	3	1332599000	0.0441868	0.0011914	0.00787952	0.00436377	-0.0403805	0.19	0.138069	0.29
JC-Pn@43	3	1326240000	0.0441849	0.00121354	0.00787925	0.00485044	-0.0840812	0.19	0.103157	0.29
JC-Pn@44	3	1327867000	0.0441876	0.00114779	0.00787915	0.00526434	-0.0238512	0.19	0.0913505	0.29
JC-Pn@45	3	1333577000	0.0441883	0.00111815	0.00787923	0.00498812	-0.00709545	0.19	0.100999	0.29
JC-Pn@46	3	1322981000	0.0441888	0.00107452	0.00787914	0.0058507	0.00399956	0.19	0.0895732	0.29
JC-Pn@47	3	1323136000	0.0441847	0.00105866	0.00787911	0.00500889	-0.0888362	0.19	0.0857646	0.29
JC-Pn@48	3	1325457000	0.044189	0.000968594	0.00787963	0.00410871	0.00784885	0.19	0.152034	0.29
JC-Pn@49	3	1326015000	0.0441843	0.000986722	0.00787876	0.00464835	-0.0972141	0.19	0.0414584	0.29
JC-Pn@50	3	1344267000	0.0441879	0.00117069	0.00787975	0.00507456	-0.0152469	0.19	0.167522	0.29
JC-Pn@51	3	1340624000	0.0441822	0.00137596	0.00787866	0.00504668	-0.144085	0.19	0.0282554	0.29
JC-Pn@52	3	1330901000	0.0441797	0.00134925	0.00787678	0.00437602	-0.200692	0.19	-0.210414	0.29
JC-Pn@53	3	1331582000	0.0441815	0.00126975	0.00787818	0.00445626	-0.16152	0.19	-0.0324276	0.29
JC-Pn@54	3	1342173000	0.0441889	0.00115039	0.00788004	0.00383828	0.00535813	0.19	0.203957	0.29
JC-Pn@55	3	1327833000	0.044183	0.000967763	0.00787928	0.00508948	-0.126197	0.19	0.106839	0.29
JC-Pn@56	3	1321770000	0.0441797	0.00135343	0.00787847	0.00400645	-0.202503	0.19	0.00489629	0.29
JC-Pn@57	3	1340786000	0.0441877	0.00115787	0.00787886	0.00435805	-0.0213605	0.19	0.0541536	0.29
JC-Pn@58	3	1338223000	0.0441788	0.00156937	0.00787903	0.00397061	-0.221523	0.19	0.0756085	0.29
JC-Pn@59	3	1334132000	0.0441814	0.00122073	0.0078783	0.00434477	-0.163784	0.19	-0.0169394	0.29
JC-Pn@60	3	1342091000	0.044182	0.00120733	0.00787827	0.00388957	-0.149972	0.19	-0.0204941	0.29
JC-Pn@61	3	1330078000	0.0441879	0.00118694	0.00787858	0.00415425	-0.0152469	0.19	0.0183532	0.29
JC-Pn@62	3	1326298000	0.0441867	0.000968261	0.00787886	0.00525671	-0.0424183	0.19	0.0538997	0.29
JC-Pn@63	3	1344550000	0.044183	0.00124932	0.00787902	0.00558502	-0.126876	0.19	0.0739581	0.29
JC-Pn@64	3	1332565000	0.0441788	0.00128477	0.00787728	0.0038433	-0.222882	0.19	-0.14643	0.29
JC-Pn@65	3	1316821000	0.0441867	0.00137531	0.00787739	0.00370611	-0.0424183	0.19	-0.1331	0.29
JC-Pn@66	3	1348819000	0.0441838	0.00114194	0.00787811	0.00414801	-0.109894	0.19	-0.0414412	0.29
JC-Pn@67	3	1335921000	0.0441833	0.00107699	0.00787765	0.00468763	-0.120989	0.19	-0.10022	0.29
JC-Pn@68	3	1339578000	0.0441836	0.00115659	0.00787829	0.00409607	-0.112611	0.19	-0.0178281	0.29
JC-Pn@69	3	1327899000	0.0441837	0.000967777	0.00787838	0.0039022	-0.1108	0.19	-0.00678329	0.29
JC-Pn@70	3	1330401000	0.0441788	0.00153784	0.00787828	0.00489966	-0.221523	0.19	-0.0199863	0.29
JC-Pn@71	3	1348102000	0.0441865	0.00113105	0.0078791	0.00454069	-0.0469469	0.19	0.0839873	0.29
JC-Pn@72	3	1312376000	0.044192	0.00118812	0.00787816	0.0051859	0.0757775	0.19	-0.0342049	0.29
JC-Pn@73	3	1338140000	0.0441914	0.001022	0.00787944	0.00579117	0.0624182	0.19	0.127151	0.29
JC-Pn@74	3	1349121000	0.044186	0.00127687	0.00787903	0.00535482	-0.0591741	0.19	0.0759893	0.29
JC-Pn@75	3	1337889000	0.0441838	0.00113396	0.00787947	0.00481159	-0.109668	0.19	0.131848	0.29
JC-Pn@76	3	1323028000	0.0441888	0.00135543	0.00787807	0.0045842	0.0035467	0.19	-0.0463923	0.29
JC-Pn@77	3	1349286000	0.0441846	0.000969725	0.00787895	0.00425039	-0.0908741	0.19	0.0649445	0.29
JC-Pn@78	3	1331624000	0.0441846	0.00096634	0.00787879	0.00447552	-0.0899684	0.19	0.0446322	0.29
JC-Pn@79	3	1344574000	0.0441866	0.00125089	0.00787876	0.00400598	-0.0453619	0.19	0.0413315	0.29
JC-Pn@80	3	1348011000	0.0441861	0.0013888	0.0078786	0.00453568	-0.0573626	0.19	0.0210192	0.29
JC-Pn@81	3	1332472000	0.0441782	0.00110575	0.00787911	0.00582446	-0.235789	0.19	0.0862724	0.29
JC-Pn@82	3	1327181000	0.0441872	0.00152015	0.00787894	0.00480912	-0.032229	0.19	0.0646906	0.29
JC-Pn@83	3	1333629000	0.0441812	0.00108267	0.00787771	0.00436015	-0.166728	0.19	-0.0922219	0.29
JC-Pn@84	3	1326892000	0.0441816	0.00121732	0.0078792	0.00539363	-0.159256	0.19	0.0969364	0.29
JC-Pn@85	3	1329364000	0.0441817	0.00120048	0.00787817	0.0053979	-0.156991	0.19	-0.0331893	0.29
JC-Pn@86	3	1325579000	0.0441816	0.00124557	0.0078778	0.00494435	-0.159029	0.19	-0.0807962	0.29
JC-Pn@87	3	1324918000	0.0441849	0.00130725	0.00787858	0.00453685	-0.0840812	0.19	0.0179723	0.29
JC-Pn@88	3	1324771000	0.0441841	0.00164056	0.00787677	0.0048943	-0.102422	0.19	-0.211938	0.29
JC-Pn@89	3	1323522000	0.0441867	0.00151726	0.00787827	0.00515079	-0.0426448	0.19	-0.0210019	0.29
JC-Pn@90	3	1334035000	0.0441834	0.00117749	0.00787835	0.00363471	-0.116913	0.19	-0.0112266	0.29
JC-Pn@91	3	1310154000	0.044186	0.00138448	0.00787718	0.00431998	-0.0591741	0.19	-0.158745	0.29
JC-Pn@92	3	1321024000	0.0441904	0.00114079	0.00787727	0.00492329	0.0404546	0.19	-0.147192	0.29
JC-Pn@93	3	1319228000	0.0441918	0.00108811	0.00787679	0.00485792	0.0732868	0.19	-0.208256	0.29
JC-Pn@94	3	1321794000	0.0441861	0.00105546	0.00787692	0.00426503	-0.0573626	0.19	-0.192514	0.29
JC-Pn@95	3	1321893000	0.0441765	0.00235144	0.00787773	0.00455949	-0.274508	0.19	-0.0899368	0.29
JC-Pn@96	3	1331642000	0.0441675	0.00263678	0.00787572	0.00447579	-0.477841	0.19	-0.345237	0.29
JC-Pn@97	3	1306884000	0.0441909	0.00100963	0.00787723	0.00430991	0.0526817	0.19	-0.152651	0.29
JC-Pn@98	3	1316441000	0.0441825	0.00116466	0.0078776	0.00567562	-0.139103	0.19	-0.105933	0.29
JC-Pn@99	3	1313187000	0.0441845	0.00112338	0.00787691	0.00455445	-0.0942705	0.19	-0.193149	0.29
JC-Pn@100	3	1325844000	0.0441703	0.00225805	0.00787697	0.00451442	-0.415573	0.19	-0.185785	0.29
JC-Pn@101	3	1310299000	0.0441841	0.00105463	0.00787803	0.00465784	-0.101969	0.19	-0.0515973	0.29
JC-Pn@102	3	1319839000	0.044187	0.0012424	0.00787782	0.00438364	-0.0376633	0.19	-0.0777494	0.29
JC-Pn@103	3	1313561000	0.0441829	0.00118109	0.00787654	0.00555269	-0.130273	0.19	-0.240883	0.29
JC-Pn@104	3	1321942000	0.0441866	0.00101315	0.00787795	0.00345132	-0.0453619	0.19	-0.0609917	0.29
JC-Pn@105	3	1325829000	0.0441934	0.00104737	0.00787847	0.00450123	0.109289	0.19	0.00515019	0.29
JC-Pn@106	3	1328579000	0.0441864	0.0016668	0.00787808	0.00448628	-0.0496641	0.19	-0.0451228	0.29
JC-Pn@107	3	1300070000	0.0441909	0.00119945	0.00787757	0.00538132	0.0508703	0.19	-0.110249	0.29
JC-Pn@108	3	1310058000	0.0441869	0.00118023	0.00787646	0.00332142	-0.0392483	0.19	-0.251039	0.29
JC-Pn@109	3	1304496000	0.0441923	0.0012396	0.00787897	0.00517031	0.0841553	0.19	0.0682453	0.29
JC-Pn@110	3	1307677000	0.0441839	0.000984712	0.00787777	0.00406297	-0.106724	0.19	-0.08397	0.29
JC-Pn@111	3	1305282000	0.0441832	0.00141204	0.00787807	0.0053799	-0.123027	0.19	-0.0457575	0.29
JC-Pn@112	3	1315426000	0.0441885	0.00097223	0.00787897	0.00510604	-0.00347259	0.19	0.0681183	0.29
JC-Pn@113	3	1294943000	0.0441899	0.00112284	0.00787846	0.00349372	0.0286803	0.19	0.00337286	0.29
JC-Pn@114	3	1308315000	0.0441849	0.00101324	0.00787691	0.00391188	-0.0834019	0.19	-0.193022	0.29
JC-Pn@115	3	1308878000	0.0441816	0.00128232	0.00787745	0.00526275	-0.157897	0.19	-0.125356	0.29
JC-Pn@116	3	1301243000	0.0441825	0.0012126	0.00787654	0.00571795	-0.138198	0.19	-0.240248	0.29
JC-Pn@117	3	1307441000	0.0441863	0.00105017	0.00787619	0.00376704	-0.0512491	0.19	-0.28557	0.29
JC-Pn@118	3	1311871000	0.044181	0.00149739	0.00787669	0.0041871	-0.171936	0.19	-0.221713	0.29
JC-Pn@119	3	1307142000	0.0441855	0.0012671	0.00787687	0.00478924	-0.0704955	0.19	-0.199242	0.29
JC-Pn@120	3	1311674000	0.0441797	0.0014986	0.00787641	0.00442108	-0.201598	0.19	-0.257132	0.29
JC-Pn@121	3	1303313000	0.0441916	0.00125889	0.00787804	0.00439651	0.0671732	0.19	-0.0495661	0.29
JC-Pn@122	3	1311601000	0.0441823	0.0012231	0.00787592	0.00574651	-0.143406	0.19	-0.319466	0.29
JC-Pn@123	3	1300140000	0.0441823	0.00103198	0.00787646	0.00499998	-0.143858	0.19	-0.250531	0.29
JC-Pn@124	3	1304413000	0.044183	0.0011873	0.00787668	0.00438559	-0.128008	0.19	-0.222475	0.29
JC-Pn@125	3	1296432000	0.0441829	0.000979384	0.00787696	0.00524126	-0.130273	0.19	-0.187182	0.29
JC-Pn@126	3	1299207000	0.0441761	0.00119864	0.00787602	0.005604	-0.282659	0.19	-0.306517	0.29
JC-Pn@127	3	1308211000	0.0441817	0.00126606	0.00787675	0.00469186	-0.157671	0.19	-0.214096	0.29
JC-Pn@128	3	1316439000	0.0441845	0.001245	0.00787646	0.0052108	-0.0942705	0.19	-0.250658	0.29
JC-Pn@129	3	1297196000	0.0441849	0.00131281	0.00787698	0.00510119	-0.0847605	0.19	-0.184643	0.29
JC-Pn@130	3	1291513000	0.0441876	0.00140118	0.00787582	0.00618444	-0.0236247	0.19	-0.33178	0.29
JC-Pn@131	3	1295857000	0.0441843	0.00105224	0.00787741	0.0045749	-0.0981198	0.19	-0.1298	0.29
JC-Pn@132	3	1281329000	0.0441814	0.00114058	0.0078761	0.00452044	-0.162652	0.19	-0.296614	0.29
JC-Pn@133	3	1295471000	0.0441845	0.00104274	0.00787587	0.00494653	-0.0942705	0.19	-0.325559	0.29
JC-Pn@134	3	1287628000	0.0441832	0.00109688	0.00787584	0.00429709	-0.122574	0.19	-0.32886	0.29
JC-Pn@135	3	1288470000	0.0441871	0.00102107	0.00787842	0.00576924	-0.0347198	0.19	-0.00195912	0.29
JC-Pn@136	3	1282541000	0.0441886	0.00107788	0.00787632	0.004964	0.000150273	0.19	-0.268177	0.29
JC-Pn@137	3	1287440000	0.0441858	0.00119869	0.00787726	0.0047	-0.0632498	0.19	-0.148715	0.29
JC-Pn@138	3	1289314000	0.0441823	0.00107345	0.00787649	0.00498918	-0.142953	0.19	-0.246976	0.29
JC-Pn@139	3	1278636000	0.0441818	0.00117618	0.00787708	0.00568128	-0.153821	0.19	-0.172582	0.29
JC-Pn@140	3	1290465000	0.0441916	0.00125	0.00787684	0.00481548	0.0673996	0.19	-0.202289	0.29
JC-Pn@141	3	1296576000	0.0441847	0.00129496	0.00787744	0.00443283	-0.0879305	0.19	-0.125737	0.29
JC-Pn@142	3	1280012000	0.0441834	0.00138363	0.00787635	0.00453417	-0.118951	0.19	-0.264876	0.29
JC-Pn@143	3	1298219000	0.0441826	0.000978742	0.00787714	0.00413825	-0.135481	0.19	-0.164838	0.29
JC-Pn@144	3	1277680000	0.0441814	0.0014572	0.00787739	0.00512143	-0.163784	0.19	-0.132085	0.29
JC-Pn@145	3	1285262000	0.0441824	0.000983635	0.00787629	0.00440517	-0.140688	0.19	-0.271986	0.29
JC-Pn@146	3	1291148000	0.0441813	0.00103395	0.00787636	0.00474191	-0.165596	0.19	-0.263099	0.29
JC-Pn@147	3	1286963000	0.0441891	0.0013216	0.00787717	0.00546631	0.00988671	0.19	-0.160268	0.29
JC-Pn@148	3	1281298000	0.0441859	0.00116128	0.00787677	0.00521228	-0.0607591	0.19	-0.211303	0.29
JC-Pn@149	3	1288633000	0.0441925	0.00100599	0.00787714	0.00505822	0.0877782	0.19	-0.163823	0.29
JC-Pn@150	3	1282939000	0.0441843	0.00113944	0.00787698	0.0066496	-0.0987991	0.19	-0.18477	0.29
JC-Pn@151	3	1280528000	0.0441861	0.00144006	0.00787727	0.00436814	-0.0575891	0.19	-0.147319	0.29
JC-Pn@152	3	1305284000	0.044192	0.00112623	0.00787885	0.00477448	0.0760039	0.19	0.0523763	0.29
JC-Pn@153	3	1291801000	0.0441919	0.000981074	0.00787784	0.00569508	0.0735132	0.19	-0.0754643	0.29
JC-Pn@154	3	1285962000	0.0441858	0.0014247	0.00787532	0.00489192	-0.0648348	0.19	-0.394875	0.29
JC-Pn@155	3	1297982000	0.0441841	0.00122425	0.00787672	0.0051986	-0.102422	0.19	-0.217777	0.29
JC-Pn@156	3	1289814000	0.0441902	0.00141016	0.00787684	0.0047224	0.0350203	0.19	-0.20267	0.29
JC-Pn@157	3	1283461000	0.0441877	0.00104062	0.00787865	0.00526461	-0.0200019	0.19	0.0278746	0.29
JC-Pn@158	3	1294747000	0.0441821	0.00143364	0.00787756	0.00496698	-0.148161	0.19	-0.110376	0.29
JC-Pn@159	3	1307450000	0.0441869	0.000975256	0.00787776	0.00440727	-0.038569	0.19	-0.0854935	0.29
JC-Pn@160	3	1292984000	0.0441881	0.00122337	0.0078783	0.0047901	-0.0107183	0.19	-0.0168125	0.29
JC-Pn@161	3	1296368000	0.0441774	0.00147282	0.00787665	0.00619557	-0.254582	0.19	-0.227045	0.29
JC-Pn@162	3	1321021000	0.0441947	0.00111174	0.00787924	0.00498629	0.138498	0.19	0.102903	0.29
JC-Pn@163	3	1287223000	0.0441846	0.00104215	0.00787793	0.00593619	-0.0917798	0.19	-0.0644194	0.29
JC-Pn@164	3	1305360000	0.0441851	0.00101221	0.00787703	0.00436496	-0.0793262	0.19	-0.178803	0.29
JC-Pn@165	3	1301030000	0.0441853	0.00135865	0.00787644	0.00488884	-0.0761562	0.19	-0.253324	0.29
JC-Pn@166	3	1327114000	0.0441861	0.00109059	0.00787869	0.00514009	-0.0573626	0.19	0.0321909	0.29
JC-Pn@167	3	1319900000	0.044193	0.00135748	0.00787928	0.0049738	0.0984204	0.19	0.1076	0.29
JC-Pn@168	3	1307603000	0.0441867	0.00112699	0.00787853	0.00417796	-0.0430976	0.19	0.0121325	0.29
JC-Pn@169	3	1309486000	0.0441836	0.00136012	0.00787841	0.00473162	-0.113517	0.19	-0.00284778	0.29
JC-Pn@170	3	1302678000	0.0441857	0.00109099	0.00787783	0.00483255	-0.0650612	0.19	-0.0763529	0.29
JC-Pn@171	3	1315684000	0.0441855	0.00140649	0.00787866	0.00538828	-0.0709484	0.19	0.0283824	0.29
JC-Pn@172	3	1305333000	0.0441865	0.00122071	0.00787865	0.00438142	-0.0469469	0.19	0.0276207	0.29
JC-Pn@173	3	1323188000	0.0441805	0.00177043	0.00787702	0.00437691	-0.183936	0.19	-0.17893	0.29
JC-Pn@174	3	1319256000	0.0441857	0.00128953	0.00787808	0.00447863	-0.0666462	0.19	-0.0448689	0.29
JC-Pn@175	3	1316480000	0.0441851	0.00105086	0.00787842	0.00449669	-0.0795527	0.19	-0.00132436	0.29
JC-Pn@176	3	1308180000	0.0441906	0.001027	0.00787919	0.00530531	0.0449832	0.19	0.0960477	0.29
JC-Pn@177	3	1319735000	0.0441866	0.00116797	0.00787832	0.00501439	-0.0460412	0.19	-0.0144004	0.29
JC-Pn@178	3	1310154000	0.0441894	0.0014215	0.00787834	0.00599003	0.0187174	0.19	-0.0118614	0.29
JC-Pn@179	3	1319363000	0.0441871	0.00153786	0.00787943	0.00509143	-0.0347198	0.19	0.126262	0.29
JC-Po pyrrhotite
JC-Po@1	4	1701358000	0.0441717	0.000885303	0.00787593	0.00380761	0.139027	0.265711	-0.0238139	0.24
JC-Po@2	4	1710673000	0.0441771	0.000852681	0.00787748	0.00248556	0.261299	0.27	0.173342	0.24
JC-Po@3	4	1721379000	0.044176	0.00087748	0.00787688	0.00358136	0.237297	0.27	0.0964095	0.24
JC-Po@4	4	1707628000	0.0441781	0.00107192	0.00787806	0.00388083	0.284847	0.27	0.246467	0.24
JC-Po@5	4	1688852000	0.0441794	0.00112579	0.0078777	0.00434259	0.313151	0.27	0.201145	0.24
JC-Po@6	4	1669592000	0.0441686	0.000961637	0.00787532	0.00403195	0.0688341	0.27	-0.101382	0.24
JC-Po@7	4	1694686000	0.0441724	0.00112244	0.00787628	0.00333393	0.154198	0.27	0.0204923	0.24
JC-Po@8	4	1699880000	0.0441696	0.000981329	0.00787503	0.00386247	0.0921562	0.27	-0.137817	0.24
JC-Po@9	4	1686050000	0.0441689	0.00125187	0.00787575	0.00408245	0.0763062	0.27	-0.0467922	0.24
JC-Po@10	4	1698747000	0.0441724	0.00098365	0.0078755	0.00353892	0.153971	0.27	-0.0781493	0.24
JC-Po@11	4	1696211000	0.0441711	0.00100898	0.00787626	0.00475448	0.126347	0.27	0.018715	0.24
JC-Po@12	4	1692671000	0.0441616	0.00109258	0.00787575	0.00349748	-0.0905718	0.27	-0.0464113	0.24
JC-Po@13	4	1698853000	0.0441687	0.000990962	0.00787558	0.00327521	0.0722305	0.27	-0.0679932	0.24
JC-Po@14	4	1718729000	0.0441684	0.000850762	0.00787654	0.0034855	0.0649848	0.27	0.0541345	0.24
JC-Po@15	4	1706922000	0.0441682	0.000918437	0.00787713	0.00363074	0.0590976	0.27	0.128909	0.24
JC-Po@16	4	1688416000	0.0441625	0.000941752	0.00787548	0.00350434	-0.0690611	0.27	-0.0813231	0.24
JC-Po@17	4	1697467000	0.0441641	0.000856112	0.0078764	0.00383127	-0.0335118	0.27	0.0366152	0.24
JC-Po@18	4	1692094000	0.0441635	0.000858624	0.00787718	0.00400367	-0.0473239	0.27	0.135511	0.24
JC-Po@19	4	1714377000	0.0441673	0.000851849	0.00787663	0.00329503	0.0391719	0.27	0.0654333	0.24
JC-Po@20	4	1700286000	0.0441686	0.00085536	0.00787638	0.00338338	0.0699662	0.27	0.0334414	0.24
JC-Po@21	4	1717881000	0.0441694	0.000905059	0.00787608	0.00272595	0.0878541	0.27	-0.00400941	0.24
JC-Po@22	4	1715216000	0.0441708	0.000978337	0.00787627	0.00331844	0.117743	0.27	0.0188419	0.24
JC-Po@23	4	1719930000	0.0441689	0.000886928	0.0078764	0.00364516	0.0756269	0.27	0.0358535	0.24
JC-Po@24	4	1705697000	0.0441675	0.000854011	0.00787645	0.00432767	0.045059	0.27	0.042455	0.24
JC-Po@25	4	1712138000	0.0441705	0.00085238	0.00787661	0.00402464	0.111176	0.27	0.0621325	0.24
JC-Po@26	4	1711667000	0.0441657	0.000852873	0.00787592	0.00382622	0.00226399	0.27	-0.0244487	0.24
JC-Po@27	4	1657009000	0.0441746	0.00107886	0.00787671	0.00330896	0.203786	0.27	0.0758433	0.24
JC-Po@28	4	1674785000	0.0441743	0.000861797	0.00787655	0.00398553	0.198351	0.27	0.0548963	0.24
JC-Po@29	4	1679863000	0.0441787	0.00113376	0.00787711	0.00436521	0.297527	0.27	0.125862	0.24
JC-Po@30	4	1694538000	0.0441805	0.00088184	0.00787757	0.00329104	0.338284	0.27	0.18426	0.24
JC-Po@31	4	1667013000	0.044177	0.00112772	0.00787649	0.00372166	0.259034	0.27	0.0479139	0.24
JC-Po@32	4	1682751000	0.0441789	0.0011685	0.00787745	0.00371247	0.301376	0.27	0.168772	0.24
JC-Po@33	4	1688302000	0.0441798	0.00119854	0.00787772	0.00416397	0.321529	0.27	0.203557	0.24
JC-Po@34	4	1691200000	0.0441804	0.00110597	0.00787771	0.00375448	0.335567	0.27	0.202541	0.24
JC-Po@35	4	1685017000	0.0441796	0.000907085	0.00787692	0.0031018	0.317	0.27	0.102122	0.24
JC-Po@36	4	1680981000	0.0441788	0.00103266	0.00787734	0.00380597	0.299791	0.27	0.155696	0.24
JC-Po@37	4	1683418000	0.0441804	0.00114119	0.00787664	0.00346785	0.335114	0.27	0.0668297	0.24
JC-Po@38	4	1705245000	0.0441685	0.00100474	0.0078766	0.00413784	0.0670226	0.27	0.0614978	0.24
JC-Po@39	4	1701201000	0.0441724	0.000855094	0.00787665	0.00358315	0.155103	0.27	0.0674645	0.24
JC-Po@40	4	1695500000	0.0441674	0.000956618	0.00787581	0.00392355	0.0427947	0.27	-0.0382864	0.24
JC-Po@41	4	1716412000	0.044168	0.000853728	0.00787619	0.00315154	0.0547955	0.27	0.00868577	0.24
JC-Po@42	4	1708456000	0.0441675	0.000853325	0.00787656	0.00301647	0.0432476	0.27	0.0562927	0.24
JC-Po@43	4	1692324000	0.0441685	0.000977037	0.00787677	0.00374823	0.0672491	0.27	0.0830796	0.24
JC-Po@44	4	1692434000	0.0441623	0.00106721	0.007876	0.00320948	-0.0729104	0.27	-0.0151812	0.24
JC-Po@45	4	1679706000	0.0441612	0.000860649	0.00787572	0.00439466	-0.0982704	0.27	-0.049839	0.24
JC-Po@46	4	1711194000	0.0441704	0.000886508	0.00787676	0.00310584	0.108686	0.27	0.082064	0.24
JC-Po@47	4	1696637000	0.0441677	0.00104607	0.00787697	0.00378611	0.0480026	0.27	0.108089	0.24
JC-Po@48	4	1675098000	0.0441682	0.000861768	0.00787684	0.00408134	0.0604562	0.27	0.0918393	0.24
JC-Po@49	4	1601169000	0.0441706	0.00116465	0.00787656	0.00332328	0.114573	0.27	0.055658	0.24
JC-Po@50	4	1715196000	0.0441662	0.000879601	0.00787593	0.00349433	0.0144911	0.27	-0.0243217	0.24
JC-Po@51	4	1704717000	0.0441648	0.000975825	0.00787604	0.0036354	-0.016756	0.27	-0.00908749	0.24
JC-Po@52	4	1713808000	0.0441667	0.000957518	0.00787723	0.00411513	0.0251333	0.27	0.140843	0.24
JC-Po@53	4	1722331000	0.0441694	0.00090022	0.00787664	0.00382057	0.0860426	0.27	0.0669567	0.24
JC-Po@54	4	1726116000	0.0441691	0.00105963	0.00787623	0.00417726	0.0812876	0.27	0.0145256	0.24
JC-Po@55	4	1686605000	0.0441609	0.000865166	0.00787539	0.00374665	-0.105743	0.27	-0.0917332	0.24
JC-Po@56	4	1667685000	0.0441539	0.000892859	0.00787572	0.00385186	-0.264696	0.27	-0.0506008	0.24
JC-Po@57	4	1718839000	0.0441629	0.00102125	0.00787458	0.00357798	-0.0611361	0.27	-0.194945	0.24
JC-Po@58	4	1705430000	0.0441687	0.000854069	0.00787654	0.00249769	0.0717776	0.27	0.0541345	0.24
JC-Po@59	4	1704346000	0.0441685	0.000893199	0.00787675	0.00290577	0.0661169	0.27	0.0802866	0.24
JC-Po@60	4	1724115000	0.0441698	0.000877619	0.00787753	0.00376254	0.0962319	0.27	0.179563	0.24
JC-Po@61	4	1727221000	0.0441675	0.000848676	0.00787692	0.00354247	0.0437005	0.27	0.101488	0.24
JC-Po@62	4	1709074000	0.0441738	0.000880226	0.00787788	0.00363257	0.18703	0.27	0.224123	0.24
JC-Po@63	4	1698615000	0.0441699	0.00116735	0.00787669	0.0033259	0.0984962	0.27	0.0727965	0.24
JC-Po@64	4	1705635000	0.0441729	0.00122814	0.00787715	0.00346179	0.165972	0.27	0.130687	0.24
JC-Po@65	4	1709563000	0.044166	0.000882183	0.0078768	0.00295265	0.00996257	0.27	0.0868881	0.24
JC-Po@66	4	1696978000	0.044166	0.000914676	0.00787584	0.00348178	0.00905686	0.27	-0.0351126	0.24
JC-Po@67	4	1707940000	0.0441715	0.00108924	0.00787672	0.00337887	0.135178	0.27	0.0769859	0.24
JC-Po@68	4	1699329000	0.0441724	0.000929462	0.00787724	0.0040032	0.155783	0.27	0.143128	0.24
JC-Po@69	4	1700274000	0.0441704	0.000855346	0.00787602	0.00415124	0.109591	0.27	-0.0127691	0.24
JC-Po@70	4	1699606000	0.0441656	0.000917476	0.00787636	0.00389516	0.000678993	0.27	0.0309024	0.24
JC-Po@71	4	1729223000	0.0441699	0.00109223	0.00787632	0.00376259	0.0975905	0.27	0.0255704	0.24
JC-Po@72	4	1719303000	0.0441697	0.000850605	0.0078771	0.0030005	0.0928355	0.27	0.12472	0.24
JC-Po@73	4	1738024000	0.0441732	0.00116646	0.00787723	0.00340687	0.171859	0.27	0.141985	0.24
JC-Po@74	4	1726237000	0.0441726	0.000913261	0.0078773	0.00451477	0.160311	0.27	0.149983	0.24
JC-Po@75	4	1709628000	0.04417	0.000981534	0.00787748	0.00402081	0.10144	0.27	0.172581	0.24
JC-Po@76	4	1722255000	0.044167	0.00101953	0.00787736	0.00367931	0.0330583	0.27	0.157981	0.24
JC-Po@77	4	1694772000	0.0441583	0.00185689	0.00787666	0.00396319	-0.165067	0.27	0.0689879	0.24
JC-Po@78	4	1708759000	0.0441697	0.000907608	0.00787713	0.00405304	0.0930619	0.27	0.128655	0.24
JC-Po@79	4	1715764000	0.044169	0.00110538	0.00787671	0.00364056	0.0776648	0.27	0.0749547	0.24
JC-Po@80	4	1722881000	0.0441708	0.000888716	0.00787688	0.00389101	0.117516	0.27	0.0964095	0.24
JC-Po@81	4	1726570000	0.0441686	0.000859469	0.00787787	0.00451268	0.0681548	0.27	0.222727	0.24
JC-Po@82	4	1714375000	0.0441623	0.000851899	0.00787651	0.00295721	-0.0729104	0.27	0.0496912	0.24
JC-Po@83	4	1730588000	0.0441637	0.000983255	0.00787691	0.00423104	-0.042116	0.27	0.101107	0.24
JC-Po@84	4	1727184000	0.0441644	0.0012133	0.00787632	0.00345432	-0.0267189	0.27	0.0251895	0.24
JC-Po@85	4	1737210000	0.044166	0.000882903	0.0078769	0.00370804	0.010189	0.27	0.0994564	0.24
JC-Po@86	4	1708089000	0.0441776	0.000965429	0.00787732	0.0032486	0.272846	0.27	0.152649	0.24
JC-Po@87	4	1716193000	0.0441642	0.00120018	0.00787505	0.00353313	-0.031021	0.27	-0.135024	0.24
JC-Po@88	4	1705026000	0.044158	0.00120584	0.0078753	0.0041623	-0.170275	0.27	-0.103286	0.24
JC-Po@89	4	1737639000	0.0441635	0.000910157	0.00787586	0.0036594	-0.0475503	0.27	-0.0323197	0.24
JC-Po@90	4	1729468000	0.0441618	0.000848176	0.00787594	0.00324124	-0.0853639	0.27	-0.0225444	0.24
JC-Po@91	4	1704283000	0.0441665	0.00085438	0.00787804	0.00377008	0.0206047	0.27	0.244055	0.24
JC-Po@92	4	1723204000	0.0441626	0.000967926	0.00787681	0.00403003	-0.0658911	0.27	0.0882846	0.24
JC-Po@93	4	1758226000	0.0441682	0.00102106	0.0078767	0.00340825	0.0595505	0.27	0.0735582	0.24
JC-Po@94	4	1711900000	0.0441626	0.000852589	0.00787554	0.00345764	-0.0661175	0.27	-0.0734521	0.24
JC-Po@95	4	1726707000	0.0441654	0.000848905	0.00787626	0.00366354	-0.00407601	0.27	0.0178263	0.24
JC-Po@96	4	1722696000	0.0441624	0.000914922	0.00787673	0.00420584	-0.0724575	0.27	0.0785093	0.24
JC-Po@97	4	1726004000	0.0441641	0.0010156	0.00787622	0.00343436	-0.0328325	0.27	0.0136369	0.24
JC-Po@98	4	1732957000	0.0441642	0.00113686	0.00787601	0.00396007	-0.0312475	0.27	-0.0137847	0.24
JC-Po@99	4	1727642000	0.0441631	0.000848612	0.00787727	0.00298585	-0.0559282	0.27	0.146556	0.24
JC-Po@100	4	1728579000	0.0441638	0.00111875	0.00787595	0.00414005	-0.0391725	0.27	-0.021021	0.24
JC-Po@101	4	1724529000	0.0441587	0.000889547	0.00787617	0.00298252	-0.156236	0.27	0.0072893	0.24
JC-Po@102	4	1749128000	0.0441662	0.000849509	0.00787548	0.00302023	0.0138119	0.27	-0.0804344	0.24
JC-Po@103	4	1711807000	0.0441594	0.000852562	0.00787495	0.00296378	-0.139933	0.27	-0.1481	0.24
JC-Po@104	4	1722248000	0.044167	0.00113402	0.00787589	0.00401563	0.0337376	0.27	-0.028765	0.24
JC-Po@105	4	1730847000	0.0441643	0.000891449	0.00787612	0.0048348	-0.0283039	0.27	0.00106866	0.24
JC-Po@106	4	1729026000	0.0441661	0.000848245	0.00787654	0.00331855	0.0115476	0.27	0.0540076	0.24
JC-Po@107	4	1733719000	0.0441628	0.000847129	0.00787597	0.00410794	-0.0624946	0.27	-0.0187358	0.24
JC-Po@108	4	1706314000	0.0441735	0.000899124	0.00787695	0.00389992	0.180463	0.27	0.106312	0.24
JC-Po@109	4	1691570000	0.0441733	0.000979506	0.00787679	0.00367277	0.175708	0.27	0.0854917	0.24
JC-Po@110	4	1704835000	0.0441735	0.000854175	0.00787705	0.00333217	0.180011	0.27	0.118245	0.24
JC-Po@111	4	1674607000	0.0441735	0.00107292	0.00787574	0.00338223	0.179105	0.27	-0.0479348	0.24
JC-Po@112	4	1690674000	0.0441756	0.00114168	0.00787657	0.00345694	0.226428	0.27	0.0570544	0.24
JC-Po@113	4	1716005000	0.0441771	0.000946668	0.0078771	0.0036071	0.261751	0.27	0.125101	0.24
JC-Po@114	4	1653978000	0.0441679	0.00118229	0.00787577	0.00514586	0.0523048	0.27	-0.0434915	0.24
JC-Po@115	4	1651582000	0.0441669	0.00100388	0.00787656	0.00355466	0.0298883	0.27	0.0557849	0.24
JC-Po@116	4	1650767000	0.0441682	0.000868099	0.00787605	0.00475168	0.060909	0.27	-0.00883359	0.24
JC-Po@117	4	1654356000	0.0441671	0.000976339	0.00787482	0.00393369	0.0341905	0.27	-0.164857	0.24
JC-Po@118	4	1657694000	0.0441681	0.000914105	0.0078762	0.00437121	0.0579655	0.27	0.010717	0.24
JC-Po@119	4	1647593000	0.0441684	0.00120437	0.00787631	0.00345175	0.0645319	0.27	0.02392	0.24
JC-Po@120	4	1654915000	0.0441681	0.00128359	0.00787498	0.00344719	0.0584183	0.27	-0.144164	0.24
JC-Po@121	4	1706612000	0.0441646	0.000853811	0.00787562	0.00445912	-0.0210582	0.27	-0.0632959	0.24
JC-Po@122	4	1685714000	0.0441624	0.000936564	0.00787526	0.00383303	-0.0704196	0.27	-0.108999	0.24
JC-Po@123	4	1694481000	0.0441647	0.000904231	0.00787557	0.00305627	-0.0190203	0.27	-0.0696435	0.24
JC-Po@124	4	1705770000	0.0441644	0.000981771	0.0078758	0.00404878	-0.0264925	0.27	-0.0405716	0.24
JC-Po@125	4	1708702000	0.0441637	0.000853293	0.00787524	0.00421151	-0.0416632	0.27	-0.111284	0.24
JC-Po@126	4	1699686000	0.0441622	0.000916705	0.00787422	0.00463275	-0.0763068	0.27	-0.241282	0.24
JC-Po@127	4	1709409000	0.0441644	0.000853116	0.0078741	0.00316671	-0.0255867	0.27	-0.256517	0.24
JC-Po@128	4	1687839000	0.0441606	0.000993701	0.00787416	0.00429128	-0.112309	0.27	-0.248265	0.24
JC-Po@129	4	1691691000	0.0441608	0.000857602	0.00787436	0.00425495	-0.10778	0.27	-0.223382	0.24
JC-Po@130	4	1664221000	0.0441509	0.000992115	0.00787443	0.00367923	-0.332851	0.27	-0.214369	0.24
JC-Po@131	4	1649137000	0.0441717	0.00109738	0.00787557	0.00449407	0.139027	0.27	-0.0698974	0.24
JC-Po@132	4	1667851000	0.0441742	0.000952884	0.00787666	0.00441178	0.196087	0.27	0.0694957	0.24
JC-Po@133	4	1657069000	0.0441734	0.00105732	0.00787642	0.00467615	0.176388	0.27	0.0383925	0.24
JC-Po@134	4	1663239000	0.044173	0.000881731	0.00787736	0.00402728	0.168689	0.27	0.158362	0.24
JC-Po@135	4	1664356000	0.0441734	0.000908409	0.00787615	0.00376908	0.177973	0.27	0.00398855	0.24
JC-Po@136	4	1659640000	0.0441728	0.000986028	0.0078754	0.00411273	0.16484	0.27	-0.0914793	0.24
JC-Po@137	4	1668851000	0.0441737	0.000863387	0.0078762	0.00334718	0.184766	0.27	0.0105901	0.24
JC-Po@138	4	1681451000	0.0441756	0.0010751	0.00787566	0.00467638	0.22824	0.27	-0.0582179	0.24
JC-Po@139	4	1670411000	0.0441744	0.000989857	0.00787544	0.00355803	0.200616	0.27	-0.0862742	0.24
JC-Po@140	4	1681944000	0.0441725	0.00122444	0.00787497	0.0039205	0.156915	0.27	-0.145815	0.24
JC-Po@141	4	1671773000	0.0441736	0.00114642	0.00787503	0.00352226	0.181369	0.27	-0.137944	0.24
JC-Po@142	4	1662580000	0.0441713	0.00116786	0.00787572	0.00349701	0.12997	0.27	-0.0509816	0.24
JC-Po@143	4	1681673000	0.0441763	0.000860007	0.00787458	0.00426136	0.242958	0.27	-0.19558	0.24
JC-Po@144	4	1694135000	0.0441768	0.000901178	0.00787515	0.00395222	0.254732	0.27	-0.12309	0.24
JC-Po@145	4	1661460000	0.0441732	0.000949358	0.0078752	0.00331511	0.172765	0.27	-0.116362	0.24
JC-Po@146	4	1665519000	0.0441734	0.00103135	0.00787498	0.00460268	0.177293	0.27	-0.144291	0.24
JC-Po@147	4	1671014000	0.0441642	0.00127765	0.00787359	0.0040991	-0.0301153	0.27	-0.321008	0.24
JC-Po@148	4	1655612000	0.0441652	0.00103894	0.00787359	0.00362143	-0.00724601	0.27	-0.320374	0.24
JC-Po@149	4	1656530000	0.0441665	0.000866598	0.00787469	0.00434233	0.0215104	0.27	-0.180726	0.24
JC-Po@150	4	1626102000	0.0441775	0.00119125	0.00787516	0.00483792	0.269676	0.27	-0.120805	0.24
JC-Po@151	4	1619634000	0.0441773	0.00113296	0.00787576	0.0050417	0.265374	0.27	-0.0455227	0.24
JC-Po@152	4	1653054000	0.0441694	0.0011887	0.00787517	0.00402303	0.0867219	0.27	-0.119916	0.24
JC-Po@153	4	1618185000	0.0441695	0.00125191	0.00787394	0.00442873	0.0885334	0.27	-0.276956	0.24
JC-Po@154	4	1604883000	0.0441653	0.000942466	0.00787467	0.00391468	-0.00588744	0.27	-0.184154	0.24
JC-Po@155	4	1652613000	0.0441729	0.000867565	0.00787506	0.00436612	0.165746	0.27	-0.134135	0.24
JC-Po@156	4	1644403000	0.0441719	0.00094907	0.00787531	0.0040392	0.144008	0.27	-0.102143	0.24
JC-Po@157	4	1628991000	0.0441688	0.000873873	0.00787452	0.00409064	0.0729098	0.27	-0.202816	0.24
JC-Po@158	4	1616184000	0.0441685	0.00102109	0.00787575	0.00409038	0.0674755	0.27	-0.0462844	0.24
JC-Po@159	4	1626469000	0.044176	0.000902905	0.0078767	0.00374918	0.235486	0.27	0.0736851	0.24
JC-Po@160	4	1620059000	0.0441723	0.000913884	0.00787682	0.0036619	0.153518	0.27	0.0889194	0.24
JC-Po@161	4	1584419000	0.044161	0.000986634	0.00787571	0.00365107	-0.103025	0.27	-0.0518703	0.24
JC-Po@162	4	1646831000	0.0441758	0.000869066	0.00787781	0.00304896	0.23141	0.27	0.215363	0.24
JC-Po@163	4	1629611000	0.0441521	0.000949394	0.00787607	0.00383077	-0.305679	0.27	-0.00578674	0.24
JC-Po@164	4	1629704000	0.0441515	0.000873846	0.00787546	0.00414482	-0.319038	0.27	-0.0834813	0.24
JC-Po@165	4	1635007000	0.0441652	0.000872295	0.00787728	0.00295511	-0.00860459	0.27	0.147317	0.24
JC-Po@166	4	1650053000	0.0441644	0.000953086	0.00787805	0.00459382	-0.0258132	0.27	0.244816	0.24
JC-Po@167	4	1641341000	0.0441652	0.00087061	0.00787788	0.00401838	-0.0079253	0.27	0.223742	0.24
JC-Po@168	4	1669467000	0.0441656	0.000904723	0.00787789	0.00402882	0.00135828	0.27	0.224631	0.24
JC-Po@169	4	1717105000	0.0441724	0.000851128	0.00787801	0.00322085	0.154877	0.27	0.240881	0.24
JC-Po@170	4	1664135000	0.0441737	0.000969248	0.00787814	0.00374214	0.185445	0.27	0.256877	0.24
JC-Po@171	4	1679405000	0.0441657	0.00101742	0.00787739	0.00437529	0.00271685	0.27	0.162044	0.24
JC-Po@172	4	1619209000	0.0441558	0.000876629	0.0078765	0.00479994	-0.222127	0.27	0.0488026	0.24
JC-Po@173	4	1651526000	0.0441629	0.000898394	0.00787652	0.00486372	-0.0602303	0.27	0.0508338	0.24
JC-Po@174	4	1659936000	0.0441621	0.0008749	0.00787631	0.00386032	-0.0781182	0.27	0.0245548	0.24
JC-Po@175	4	1649189000	0.0441697	0.00114762	0.00787724	0.0045897	0.0935148	0.27	0.143128	0.24
JC-Po@176	4	1625494000	0.0441613	0.000887387	0.00787599	0.00451469	-0.0964589	0.27	-0.0160698	0.24
JC-Po@177	4	1655788000	0.0441616	0.000917691	0.00787702	0.00469268	-0.0903454	0.27	0.115325	0.24
JC-Po@178	4	1608243000	0.0441543	0.000879719	0.00787581	0.00396201	-0.255638	0.27	-0.039302	0.24
JC-Po@179	4	1628291000	0.0441589	0.000909657	0.00787651	0.0034341	-0.150802	0.27	0.0500721	0.24
JC-Po@180	4	1660326000	0.0441646	0.000918152	0.00787658	0.00343257	-0.0219639	0.27	0.0593396	0.24
JC-Po@181	4	1665365000	0.0441634	0.000864331	0.0078761	0.00396131	-0.0493618	0.27	-0.00197818	0.24
JC-Po@182	4	1644259000	0.0441746	0.00100492	0.00787831	0.00424079	0.205597	0.27	0.277824	0.24
JC-Po@183	4	1607963000	0.0441635	0.000879619	0.0078768	0.00330567	-0.0475503	0.27	0.0870151	0.24
JC-Po@184	4	1640058000	0.0441642	0.000870963	0.00787675	0.00334199	-0.0314739	0.27	0.0806675	0.24
JC-Po@185	4	1651153000	0.0441652	0.00125347	0.00787662	0.00421976	-0.00860459	0.27	0.063402	0.24
JC-Po@186	4	1621613000	0.044175	0.000948827	0.00787786	0.00424399	0.212843	0.27	0.221203	0.24
JC-Po@187	4	1635754000	0.0441605	0.000925822	0.0078756	0.004297	-0.114573	0.27	-0.0659619	0.24
JC-Po@188	4	1609488000	0.0441571	0.000953334	0.00787636	0.00443648	-0.192691	0.27	0.0306485	0.24
JC-Po@189	4	1615088000	0.044155	0.000962151	0.00787587	0.00352828	-0.238883	0.27	-0.0307963	0.24
JC-Po@190	4	1637196000	0.0441653	0.00105186	0.00787738	0.00334771	-0.00679316	0.27	0.160012	0.24
JC-Po@191	4	1632132000	0.0441751	0.00105973	0.0078781	0.00315851	0.216918	0.27	0.251926	0.24
JC-Po@192	4	1631768000	0.0441764	0.00103641	0.00787727	0.00303384	0.246128	0.27	0.146175	0.24
JC-Po@193	4	1625655000	0.0441704	0.00107511	0.00787746	0.00439581	0.110271	0.27	0.170042	0.24
JC-Po@194	4	1625142000	0.0441686	0.00113396	0.00787777	0.00412711	0.0681548	0.27	0.209651	0.24
JC-Po@195	4	1631858000	0.0441645	0.0013331	0.00787638	0.00452384	-0.0233225	0.27	0.0334414	0.24
JC-Po@196	4	1642362000	0.044164	0.000870354	0.00787717	0.00405664	-0.0350968	0.27	0.13386	0.24
JC-Po@197	4	1622697000	0.0441728	0.00111338	0.00787762	0.00385971	0.165066	0.27	0.190989	0.24
JC-Po@198	4	1634007000	0.044164	0.00111914	0.00787716	0.00385123	-0.0344175	0.27	0.131956	0.24
JC-Po@199	4	1628415000	0.0441757	0.000894746	0.00787712	0.00284447	0.229146	0.27	0.127767	0.24
JC-Po@200	4	1617680000	0.0441671	0.000987521	0.00787778	0.0042272	0.0341905	0.27	0.211301	0.24
JC-Po@201	4	1617976000	0.044167	0.000901088	0.00787756	0.00478303	0.0314733	0.27	0.182737	0.24
JC-Po@202	4	1632975000	0.0441675	0.00107372	0.00787708	0.00406119	0.043474	0.27	0.121927	0.24
JC-Po@203	4	1624026000	0.0441673	0.000937977	0.00787633	0.00427213	0.0398512	0.27	0.0272207	0.24
JC-Po@204	4	1637539000	0.0441713	0.000972834	0.00787691	0.00308675	0.129064	0.27	0.101234	0.24
Repeatibility SE was calculated for n = 40 cycles
