# Supplementary material for: New potential pyrrhotite and pentlandite reference materials for sulfur and iron isotope microanalysis
Source: Royal Society of Chemistry journal article supplement (doi:10.1039/d1ja00029b), 2021-01-01
Supplement: d1ja00029b4.xlsx [file d1ja00029b4.xlsx]

## Sheet: Sheet1
Table S5.
Iron isotope results from sample sulfides
Sample ID				Normalized δ values measured by solution MC-ICPMS ‰
		56/54	57/54	δ56Fe	δ57Fe
JC-Pn pentlandite				0.460763	0.658988
JC-Pn@1		16.8269	0.401486	1.45111	2.29966
JC-Pn@2		16.8274	0.401449	1.48512	2.19648
JC-Pn@3		16.8219	0.401174	1.1352	1.43684
JC-Pn@4		16.82	0.401162	1.0113	1.40608
JC-Pn@5		16.8212	0.401217	1.08768	1.55626
JC-Pn@6		16.8238	0.401188	1.2542	1.47671
JC-Pn@7		16.8238	0.401303	1.25165	1.79516
JC-Pn@8		16.8259	0.40141	1.38925	2.08973
JC-Pn@9		16.8244	0.401416	1.29261	2.10465
JC-Pn@10		16.824	0.401403	1.26446	2.07097
JC-Pn@11		16.8218	0.401204	1.13017	1.5201
JC-Pn@12		16.8223	0.401157	1.16139	1.39058
JC-Pn@13		16.8218	0.401194	1.12832	1.49436
JC-Pn@14		16.8256	0.401275	1.37001	1.71797
JC-Pn@15		16.8249	0.401255	1.32281	1.66217
JC-Pn@16		16.83	0.401433	1.64948	2.15268
JC-Pn@17		16.8273	0.401413	1.47519	2.09753
JC-Pn@18		16.8268	0.401388	1.44257	2.02749
JC-Pn@19		16.8289	0.401405	1.57666	2.07533
JC-Pn@20		16.8273	0.401527	1.48041	2.41066
JC-Pn@21		16.8267	0.40141	1.44085	2.08964
JC-Pn@22		16.822	0.401262	1.14164	1.68117
JC-Pn@23		16.8258	0.401394	1.38008	2.04584
JC-Pn@24		16.8271	0.401274	1.46162	1.71414
JC-Pn@25		16.8274	0.401535	1.48353	2.43389
JC-Pn@26		16.8253	0.401367	1.35007	1.96917
JC-Pn@27		16.8274	0.401409	1.48633	2.08562
JC-Pn@28		16.8328	0.401517	1.82676	2.38457
JC-Pn@29		16.8318	0.401496	1.76306	2.32766
JC-Pn@30		16.8275	0.401426	1.49162	2.13193
JC-Pn@31		16.8267	0.401381	1.43894	2.00818
JC-Pn@32		16.8259	0.401258	1.38619	1.67108
JC-Pn@33		16.8255	0.401283	1.36352	1.73922
JC-Pn@34		16.8263	0.401342	1.41155	1.90142
JC-Pn@35		16.8261	0.401312	1.40403	1.81753
JC-Pn@36		16.8279	0.401443	1.51857	2.18142
JC-Pn@37		16.8245	0.401375	1.30198	1.99356
JC-Pn@38		16.8258	0.401297	1.38008	1.77781
JC-Pn@39		16.8274	0.401331	1.4813	1.87066
JC-Pn@40		16.8227	0.401197	1.18661	1.50286
JC-Pn@41		16.825	0.401244	1.32956	1.63058
JC-Pn@42		16.8275	0.401396	1.49194	2.0492
JC-Pn@43		16.8242	0.401435	1.2779	2.15844
JC-Pn@44		16.8277	0.401443	1.50513	2.17902
JC-Pn@45		16.8308	0.401487	1.69821	2.30137
JC-Pn@46		16.8303	0.401489	1.66808	2.3068
JC-Pn@47		16.8298	0.401441	1.63884	2.17466
JC-Pn@48		16.8256	0.401301	1.36963	1.78724
JC-Pn@49		16.8258	0.401457	1.37944	2.21974
JC-Pn@50		16.8284	0.401542	1.54844	2.45375
JC-Pn@51		16.8247	0.401337	1.31344	1.88835
JC-Pn@52		16.8289	0.401501	1.57698	2.34106
JC-Pn@53		16.8324	0.401568	1.79962	2.52531
JC-Pn@54		16.8308	0.401514	1.69999	2.37737
JC-Pn@55		16.8307	0.401561	1.69114	2.50534
JC-Pn@56		16.83	0.401423	1.64827	2.12614
JC-Pn@57		16.8287	0.401341	1.56781	1.89756
JC-Pn@58		16.8282	0.401496	1.53456	2.32592
JC-Pn@59		16.8285	0.401544	1.55679	2.45902
JC-Pn@60		16.8273	0.401294	1.47525	1.76879
JC-Pn@61		16.8292	0.401469	1.60062	2.25248
JC-Pn@62		16.8298	0.401391	1.63979	2.03629
JC-Pn@63		16.8261	0.401311	1.40269	1.81494
JC-Pn@64		16.8254	0.40139	1.35402	2.03348
JC-Pn@65		16.8267	0.401324	1.43798	1.85268
JC-Pn@66		16.8349	0.40155	1.96054	2.4764
JC-Pn@67		16.8269	0.401325	1.45372	1.85417
JC-Pn@68		16.8371	0.401586	2.10355	2.57582
JC-Pn@69		16.8322	0.401427	1.78841	2.13687
JC-Pn@70		16.8309	0.401641	1.70643	2.72586
JC-Pn@71		16.8313	0.401546	1.73286	2.46517
JC-Pn@72		16.83	0.401433	1.64839	2.15345
JC-Pn@73		16.8295	0.401548	1.61979	2.47069
JC-Pn@74		16.8268	0.401226	1.44633	1.58087
JC-Pn@75		16.8258	0.401336	1.37976	1.88424
JC-Pn@76		16.8289	0.401373	1.57647	1.98644
JC-Pn@77		16.8307	0.401496	1.69178	2.326
JC-Pn@78		16.8311	0.401487	1.71719	2.30228
JC-Pn@79		16.8348	0.401476	1.95799	2.27152
JC-Pn@80		16.832	0.401502	1.77841	2.34288
JC-Pn@81		16.8346	0.401581	1.94028	2.56024
JC-Pn@82		16.8346	0.401686	1.94519	2.84942
JC-Pn@83		16.8316	0.401526	1.75102	2.40835
JC-Pn@84		16.834	0.401656	1.90136	2.76752
JC-Pn@85		16.8322	0.401552	1.79281	2.4801
JC-Pn@86		16.828	0.401565	1.52341	2.51673
JC-Pn@87		16.8318	0.401458	1.76401	2.22258
JC-Pn@88		16.8307	0.401485	1.69311	2.29574
JC-Pn@89		16.8327	0.401586	1.81899	2.57334
JC-Pn@90		16.8323	0.401602	1.79848	2.61946
JC-Pn@91		16.8362	0.401692	2.04386	2.86614
JC-Pn@92		16.8256	0.401398	1.36982	2.05549
JC-Pn@93		16.8275	0.40137	1.48958	1.97819
JC-Pn@94		16.8261	0.401402	1.40116	2.06785
JC-Pn@95		16.8317	0.401515	1.75758	2.37781
JC-Pn@96		16.8278	0.401479	1.50755	2.28062
JC-Pn@97		16.8292	0.401461	1.5959	2.22906
JC-Pn@98		16.83	0.40149	1.65203	2.31058
JC-Pn@99		16.8286	0.401468	1.55825	2.24904
JC-Pn@100		16.8292	0.401474	1.60055	2.2652
JC-Pn@101		16.8244	0.401283	1.29287	1.74004
JC-Pn@102		16.8295	0.401428	1.61864	2.13886
JC-Pn@103		16.8307	0.401409	1.69636	2.08551
JC-Pn@104		16.828	0.401373	1.52481	1.98705
JC-Pn@105		16.8325	0.401521	1.80861	2.39571
JC-Pn@106		16.8417	0.401718	1.64381	2.20515
JC-Pn@107		16.8299	0.401452	1.72159	2.20357
JC-Pn@108		16.8311	0.401451	1.69375	2.40791
JC-Pn@109		16.8307	0.401526	1.61342	2.27019
JC-Pn@110		16.8294	0.401476	1.60584	1.97949
JC-Pn@111		16.8293	0.40137	1.40428	1.94644
JC-Pn@112		16.8262	0.401358	1.60004	2.23866
JC-Pn@113		16.8292	0.401464	1.53003	1.89444
JC-Pn@114		16.8281	0.401339	1.54067	2.53025
JC-Pn@115		16.8283	0.40157	1.83613	2.77684
JC-Pn@116		16.8329	0.401659	1.5099	1.98233
JC-Pn@117		16.8278	0.401371	2.07393	2.68691
JC-Pn@118		16.8367	0.401627	1.46002	2.17648
JC-Pn@119		16.827	0.401442	1.55927	2.27902
JC-Pn@120		16.8286	0.401479	1.49806	2.33717
JC-Pn@121		16.8276	0.4015	1.02812	1.64633
JC-Pn@122		16.8202	0.401249	1.31453	1.73304
JC-Pn@123		16.8247	0.401281	1.41926	2.25262
JC-Pn@124		16.8264	0.401469	1.67241	2.38677
JC-Pn@125		16.8304	0.401518	1.54615	2.32848
JC-Pn@126		16.8284	0.401497	1.5006	2.03899
JC-Pn@127		16.8277	0.401392	1.43607	2.40973
JC-Pn@128		16.8267	0.401526	1.7249	2.49759
JC-Pn@129		16.8312	0.401558	1.32026	2.4044
JC-Pn@130		16.8248	0.401524	1.57297	2.48297
JC-Pn@131		16.8288	0.401553	1.81224	2.60832
JC-Pn@132		16.8326	0.401598	1.64546	2.53864
JC-Pn@133		16.8299	0.401573	1.49965	2.21494
JC-Pn@134		16.8276	0.401456	1.44748	1.98115
JC-Pn@135		16.8279	0.401361	1.5178	1.95458
JC-Pn@136		16.8254	0.401373	1.35402	1.98622
JC-Pn@137		16.8263	0.401361	1.41161	1.95353
JC-Pn@138		16.8272	0.401425	1.46824	2.13022
JC-Pn@139		16.8243	0.401349	1.28733	1.92173
JC-Pn@140		16.8242	0.401351	1.28006	1.92526
JC-Pn@141		16.8271	0.401515	1.46518	2.37831
JC-Pn@142		16.8222	0.401385	1.14973	2.02115
JC-Pn@143		16.8263	0.401355	1.41193	1.93637
JC-Pn@144		16.8217	0.401243	1.11871	1.62942
JC-Pn@145		16.8221	0.401146	1.14514	1.36203
JC-Pn@146		16.8202	0.40112	1.02513	1.28942
JC-Pn@147		16.8199	0.40123	1.00805	1.59193
JC-Pn@148		16.8247	0.401437	1.31236	2.16418
JC-Pn@149		16.8241	0.401296	1.27057	1.77591
JC-Pn@150		16.8288	0.401386	1.57233	2.02156
JC-Pn@151		16.8248	0.40137	1.32064	1.97927
JC-Pn@152		16.8213	0.401196	1.09367	1.49811
JC-Pn@153		16.8243	0.401336	1.2893	1.88393
JC-Pn@154		16.8212	0.401187	1.08927	1.47271
JC-Pn@155		16.8231	0.401204	1.20904	1.52071
JC-Pn@156		16.823	0.401216	1.2005	1.55499
JC-Pn@157		16.8248	0.401198	1.31669	1.50534
JC-Pn@158		16.8257	0.40137	1.37447	1.97858
JC-Pn@159		16.822	0.401257	1.13935	1.66832
JC-Pn@160		16.8235	0.401353	1.23452	1.9329
JC-Pn@161		16.828	0.401424	1.52067	2.12818
JC-Pn@162		16.82	0.40122	1.01073	1.566
JC-Pn@163		16.8243	0.401388	1.28822	2.02749
JC-Pn@164		16.8212	0.401353	1.08647	1.93141
JC-Pn@165		16.8261	0.401419	1.40301	2.11367
JC-Pn@166		16.8232	0.401369	1.21445	1.97643
JC-Pn@167		16.8241	0.401286	1.27535	1.74824
JC-Pn@168		16.825	0.401391	1.32994	2.03541
JC-Pn@169		16.8294	0.401396	1.61196	2.05135
JC-Pn@170		16.8288	0.401506	1.57259	2.35505
JC-Pn@171		16.8257	0.4015	1.37613	2.33778
JC-Pn@172		16.8199	0.401162	1.00882	1.40476
JC-Pn@173		16.8285	0.401552	1.55131	2.48059
JC-Pn@174		16.825	0.401459	1.33287	2.22487
JC-Pn@175		16.8269	0.401406	1.45314	2.07858
JC-Pn@176		16.8251	0.401355	1.3395	1.93775
JC-Pn@177		16.8249	0.40131	1.32402	1.81442
JC-Pn@178		16.823	0.401303	1.2047	1.79461
JC-Pn@179		16.8236	0.401392	1.23968	2.03908
JC-Pn@180		16.8248	0.401422	1.31962	2.12346
JC-Pn@181		16.8233	0.401367	1.22254	1.97113
JC-Pn@182		16.8205	0.401233	1.04551	1.60101
JC-Pn@183		16.8258	0.401452	1.38116	2.20578
JC-Pn@184		16.8203	0.401268	1.03379	1.69789
JC-Pn@185		16.8216	0.401355	1.1131	1.93662
JC-Pn@186		16.824	0.401328	1.26503	1.86206
JC-Po pyrrhotite				0.329741	0.466521
JC-Po@1		16.781	0.399944	-0.171347	-0.237622
JC-Po@2		16.78	0.399982	-0.23798	-0.134394
JC-Po@3		16.7792	0.399875	-0.290153	-0.428049
JC-Po@4		16.7774	0.399813	-0.40348	-0.599608
JC-Po@5		16.7788	0.399837	-0.314487	-0.534422
JC-Po@6		16.7791	0.399839	-0.293083	-0.528711
JC-Po@7		16.7789	0.399858	-0.305824	-0.476573
JC-Po@8		16.7782	0.399801	-0.349651	-0.631525
JC-Po@9		16.7814	0.39992	-0.147331	-0.303249
JC-Po@10		16.7807	0.399937	-0.188467	-0.258512
JC-Po@11		16.7815	0.400016	-0.142439	-0.0397016
JC-Po@12		16.7814	0.399934	-0.14711	-0.266715
JC-Po@13		16.7839	0.400004	0.0130087	-0.0724078
JC-Po@14		16.7815	0.399909	-0.137967	-0.333566
JC-Po@15		16.7802	0.399981	-0.223074	-0.137263
JC-Po@16		16.7783	0.399876	-0.342962	-0.426339
JC-Po@17		16.7809	0.399912	-0.180966	-0.326256
JC-Po@18		16.7765	0.399849	-0.459347	-0.499497
JC-Po@19		16.7773	0.39985	-0.406602	-0.496684
JC-Po@20		16.779	0.399888	-0.298243	-0.392463
JC-Po@21		16.78	0.399887	-0.233011	-0.394753
JC-Po@22		16.7786	0.39982	-0.327546	-0.581291
JC-Po@23		16.7826	0.39996	-0.0686582	-0.194477
JC-Po@24		16.7797	0.399924	-0.258429	-0.29296
JC-Po@25		16.7876	0.400197	-0.0316469	-0.0404905
JC-Po@26		16.7832	0.400016	-0.165232	-0.340904
JC-Po@27		16.7811	0.399907	-0.261805	-0.372877
JC-Po@28		16.7796	0.399895	-0.349078	-0.541511
JC-Po@29		16.7782	0.399834	-0.298753	-0.431608
JC-Po@30		16.779	0.399874	-0.320539	-0.571332
JC-Po@31		16.7787	0.399823	-0.213136	-0.474504
JC-Po@32		16.7804	0.399858	-0.202944	-0.363277
JC-Po@33		16.7805	0.399899	0.0529504	-0.187111
JC-Po@34		16.7845	0.399962	-0.135355	-0.143084
JC-Po@35		16.7816	0.399978	-0.236388	-0.380573
JC-Po@36		16.78	0.399892	-0.215047	-0.485622
JC-Po@37		16.7803	0.399854	-0.157333	-0.296739
JC-Po@38		16.7812	0.399923	-0.508399	-0.912049
JC-Po@39		16.779	0.399854	-0.29767	-0.486891
JC-Po@40		16.7811	0.399965	-0.163384	-0.180987
JC-Po@41		16.7804	0.399877	-0.211034	-0.42336
JC-Po@42		16.7819	0.399891	-0.1172	-0.384077
JC-Po@43		16.7822	0.400077	-0.09828	0.127675
JC-Po@44		16.7824	0.399942	-0.0813988	-0.24438
JC-Po@45		16.7795	0.399881	-0.268239	-0.410697
JC-Po@46		16.7803	0.399981	-0.218742	-0.136132
JC-Po@47		16.7797	0.399934	-0.256454	-0.266891
JC-Po@48		16.7795	0.399859	-0.268621	-0.472987
JC-Po@49		16.7804	0.399901	-0.208295	-0.355415
JC-Po@50		16.7786	0.399855	-0.32812	-0.483966
JC-Po@51		16.7836	0.399937	-0.00986055	-0.256408
JC-Po@52		16.7804	0.399847	-0.207658	-0.504573
JC-Po@53		16.7774	0.399792	-0.404436	-0.65707
JC-Po@54		16.7793	0.3998	-0.283464	-0.636187
JC-Po@55		16.7808	0.399886	-0.184088	-0.397566
JC-Po@56		16.7813	0.399906	-0.155931	-0.343911
JC-Po@57		16.78	0.399909	-0.238617	-0.335056
JC-Po@58		16.7811	0.399888	-0.167971	-0.392104
JC-Po@59		16.7811	0.399857	-0.167143	-0.477897
JC-Po@60		16.7786	0.399826	-0.324298	-0.563249
JC-Po@61		16.7775	0.399801	-0.394689	-0.633015
JC-Po@62		16.7773	0.39978	-0.410105	-0.691332
JC-Po@63		16.7764	0.399788	-0.466992	-0.667028
JC-Po@64		16.7768	0.399768	-0.439217	-0.723194
JC-Po@65		16.7765	0.399812	-0.458519	-0.600877
JC-Po@66		16.7774	0.399778	-0.403544	-0.695691
JC-Po@67		16.7776	0.399841	-0.389593	-0.52336
JC-Po@68		16.7765	0.399779	-0.458201	-0.691828
JC-Po@69		16.7757	0.399754	-0.512603	-0.762532
JC-Po@70		16.7808	0.399869	-0.182814	-0.44507
JC-Po@71		16.7745	0.399756	-0.584842	-0.757842
JC-Po@72		16.7765	0.39973	-0.461704	-0.827442
JC-Po@73		16.7783	0.399916	-0.345574	-0.315222
JC-Po@74		16.7787	0.399858	-0.320475	-0.475966
JC-Po@75		16.7815	0.400057	-0.138285	0.0747922
JC-Po@76		16.7798	0.39989	-0.251358	-0.385649
JC-Po@77		16.784	0.40008	0.018742	0.137909
JC-Po@78		16.7791	0.399878	-0.294676	-0.419773
JC-Po@79		16.7773	0.399804	-0.41087	-0.624104
JC-Po@80		16.7768	0.399903	-0.437625	-0.350504
JC-Po@81		16.778	0.399854	-0.364175	-0.485897
JC-Po@82		16.778	0.399876	-0.365641	-0.426615
JC-Po@83		16.778	0.399825	-0.365641	-0.566587
JC-Po@84		16.7781	0.399814	-0.35806	-0.59627
JC-Po@85		16.7775	0.399877	-0.398448	-0.422808
JC-Po@86		16.7741	0.399738	-0.611916	-0.805953
JC-Po@87		16.778	0.399783	-0.360927	-0.681097
JC-Po@88		16.7785	0.399922	-0.332834	-0.299691
JC-Po@89		16.7777	0.399758	-0.380993	-0.750863
JC-Po@90		16.7778	0.399868	-0.379018	-0.44667
JC-Po@91		16.7753	0.3998	-0.534453	-0.635332
JC-Po@92		16.7755	0.399829	-0.525535	-0.556408
JC-Po@93		16.776	0.399759	-0.489925	-0.749594
JC-Po@94		16.7771	0.399836	-0.420807	-0.536435
JC-Po@95		16.7746	0.399716	-0.583186	-0.867746
JC-Po@96		16.7775	0.399811	-0.392332	-0.60358
JC-Po@97		16.7737	0.399695	-0.636059	-0.925511
JC-Po@98		16.7754	0.399752	-0.526299	-0.768353
JC-Po@99		16.775	0.39976	-0.552799	-0.74576
JC-Po@100		16.7812	0.399967	-0.162174	-0.174642
JC-Po@101		16.7727	0.399683	-0.698997	-0.957125
JC-Po@102		16.774	0.399729	-0.615419	-0.830863
JC-Po@103		16.7735	0.399725	-0.649691	-0.840932
JC-Po@104		16.7724	0.399693	-0.720784	-0.930835
JC-Po@105		16.7758	0.399746	-0.500627	-0.784215
JC-Po@106		16.7736	0.399693	-0.644086	-0.929594
JC-Po@107		16.7778	0.39976	-0.375642	-0.745815
JC-Po@108		16.7786	0.399808	-0.326336	-0.613291
JC-Po@109		16.7767	0.399846	-0.447626	-0.507773
JC-Po@110		16.7736	0.399686	-0.642939	-0.948684
JC-Po@111		16.7751	0.399792	-0.549551	-0.65616
JC-Po@112		16.7756	0.399807	-0.513686	-0.616325
JC-Po@113		16.7749	0.399802	-0.560125	-0.628491
JC-Po@114		16.7749	0.39973	-0.56089	-0.827194
JC-Po@115		16.7769	0.39976	-0.433166	-0.744435
JC-Po@116		16.775	0.399727	-0.552099	-0.83776
JC-Po@117		16.7758	0.39974	-0.501136	-0.801566
JC-Po@118		16.7757	0.399745	-0.509736	-0.788132
JC-Po@119		16.7759	0.399818	-0.500308	-0.585897
JC-Po@120		16.7769	0.399765	-0.432592	-0.731222
JC-Po@121		16.7788	0.399874	-0.312067	-0.430339
JC-Po@122		16.7782	0.399861	-0.347868	-0.467911
JC-Po@123		16.7738	0.399736	-0.633893	-0.812132
JC-Po@124		16.7764	0.399791	-0.466673	-0.661318
JC-Po@125		16.7765	0.399792	-0.460685	-0.657153
JC-Po@126		16.7773	0.399833	-0.410169	-0.543525
JC-Po@127		16.7764	0.399845	-0.467374	-0.510063
JC-Po@128		16.7758	0.399809	-0.500691	-0.610146
JC-Po@129		16.7772	0.399803	-0.412271	-0.627166
